# Supplementary material for: Hydrogen bonding to carbonyl hydride complex Cp*Mo(PMe3)2(CO)H and its role in proton transfer
Source: Royal Society of Chemistry journal article supplement (doi:10.1039/b916084a), 2010-01-01
Supplement: b916084a.pdf [file b916084a.pdf]

## Hydrogen bonding to carbonyl hydride complex $\text{Cp}^*\text{Mo}(\text{PMe}_3)_2(\text{CO})\text{H}$ and its role in proton transfer

Pavel A. Dub,<sup>a,b</sup> Oleg A. Filippov,<sup>a</sup> Natalia V. Belkova,<sup>\*a</sup> Jean-Claude Daran,<sup>b</sup> Lina M. Epstein,<sup>a</sup>  
Rinaldo Poli<sup>\*b,c</sup> and Elena S. Shubina<sup>\*a</sup>

<sup>a</sup> A. N. Nesmeyanov Institute of Organoelement Compounds, Russian Academy of Sciences, Vavilov Street 28, 119991 Moscow, Russia Fax: +7 499 1355085; Tel: +7 499 1356448; E-mail: [nataliabelk@ineos.ac.ru](mailto:nataliabelk@ineos.ac.ru)

<sup>b</sup> CNRS; LCC (Laboratoire de Chimie de Coordination); Université de Toulouse; UPS, INPT; 205, route de Narbonne, F-31077 Toulouse, France

<sup>c</sup> Institut Universitaire de France, 103, bd Saint-Michel, 75005 Paris, France

### Supplementary information

**Table S1.** Selected NMR (500 MHz) and IR data for  $\text{Cp}^*\text{MoH}(\text{PMe}_3)_2(\text{CO})$  in different solvents.

**Figure S1.** Potential energy curves for the proton transfer from  $\text{CF}_3\text{COOH}$  to **1** starting from the dihydrogen bonded complexes **B** (top) and **D** (bottom).

**Figure S2.** NMR spectra (hydride region on the left, phosphorus on the right) of  $\text{Cp}^*\text{MoH}(\text{PMe}_3)_2(\text{CO})$  in the presence of increasing amount of  $\text{CF}_3\text{COOH}$

**Figure S3.** IR spectra ( $\nu_{\text{CO}}$  region) of  $\text{Cp}^*\text{Mo}(\text{PMe}_3)_2(\text{CO})\text{H}$  (**1**, 0.07 M) at 200 K (a) and 250 K (b), and **1** in the presence of 5 equiv. PFTB at 200K (c), 230K (d), 250K (e).

**Figure S4.**  $^1\text{H}$  NMR (500.3 MHz) spectrum (hydride region) of **1** (a), and of **1** in the presence of 3 equiv (b) or 5 equiv PFTB (c). 200K, toluene- $d_8$ .

**Table S2.** Geometrical parameters (distances in Å, angles in degrees) for H-complexes between  $\text{Cp}^*\text{MoH}(\text{PMe}_3)_2(\text{CO})$  and proton donors.

**Table S3.** XYZ coordinates for all the optimized geometries

**Table S1.** Selected NMR (500 MHz) and IR data for compound **1** in different solvents.

| T    |                                                                                          | toluene                                                                                                                          | CH <sub>2</sub> Cl <sub>2</sub> <sup>a</sup>                                                                                     | THF                                                                                                                              | hexane                        |
|------|------------------------------------------------------------------------------------------|----------------------------------------------------------------------------------------------------------------------------------|----------------------------------------------------------------------------------------------------------------------------------|----------------------------------------------------------------------------------------------------------------------------------|-------------------------------|
| 200K | <sup>1</sup> H NMR/ppm                                                                   | -6.85 (t, <sup>2</sup> J <sub>HP</sub> = 77Hz, 1H, MoH), 1.34 (d, <sup>2</sup> J <sub>P-H</sub> = 8 Hz, 18H), 1.96 (s, 15H, Cp*) | -6.98 (t, <sup>2</sup> J <sub>HP</sub> = 77Hz, 1H, MoH), 1.31 (d, <sup>2</sup> J <sub>P-H</sub> = 8 Hz, 18H), 1.89 (s, 15H, Cp*) | -7.03 (t, <sup>2</sup> J <sub>HP</sub> = 77Hz, 1H, MoH), 1.38 (d, <sup>2</sup> J <sub>P-H</sub> = 8 Hz, 18H), 1.95 (s, 15H, Cp*) |                               |
|      | <sup>31</sup> P{ <sup>1</sup> H} NMR/ppm                                                 | 31.9 (s)                                                                                                                         | 31.4 (s)                                                                                                                         | 32.0 (s)                                                                                                                         |                               |
|      | <sup>13</sup> C{ <sup>1</sup> H} NMR/ppm                                                 | 253.0 (t, <sup>2</sup> J <sub>CP</sub> = 28 Hz, <sup>13</sup> CO)                                                                | 255.0 (t, <sup>2</sup> J <sub>CP</sub> = 28 Hz, <sup>13</sup> CO)                                                                | 252.4 (t, <sup>2</sup> J <sub>CP</sub> = 28 Hz, <sup>13</sup> CO)                                                                |                               |
|      | ν <sub>CO</sub> IR (ε/M <sup>-1</sup> ·cm <sup>-1</sup> )                                | 1771 (1890)                                                                                                                      | 1751 (1250)                                                                                                                      | 1776 (2400)                                                                                                                      | 1796 (3740)                   |
| 298K | <sup>1</sup> H NMR/ppm                                                                   | -6.88 (t, <sup>2</sup> J <sub>HP</sub> = 78Hz, H), 1.33 (d, <sup>2</sup> J <sub>P-H</sub> = 8 Hz, 18H), 1.93 (s, Cp*)            |                                                                                                                                  |                                                                                                                                  |                               |
|      | <sup>31</sup> P{ <sup>1</sup> H} NMR/ppm                                                 | 30.3 (s)                                                                                                                         |                                                                                                                                  |                                                                                                                                  |                               |
|      | <sup>13</sup> C{ <sup>1</sup> H} NMR/ppm                                                 | 252.7 (vt, <sup>2</sup> J <sub>CP</sub> = 29 Hz, <sup>13</sup> CO)                                                               |                                                                                                                                  |                                                                                                                                  |                               |
|      | ν <sub>CO</sub> IR (ε/M <sup>-1</sup> ·cm <sup>-1</sup> )                                | 1778 (1060)                                                                                                                      |                                                                                                                                  | 1788 (1556)                                                                                                                      | 1800 (2253)                   |
|      | [dv/dT] / cm <sup>-1</sup> K <sup>-1</sup><br>[dε/dT] / cm <sup>-1</sup> K <sup>-1</sup> | 7.9·10 <sup>-2</sup><br>-8.7                                                                                                     |                                                                                                                                  | 1.2·10 <sup>-1</sup><br>-8.7                                                                                                     | 4.0·10 <sup>-2</sup><br>-14.7 |

<sup>a</sup> complex **1** is not stable in this solvent at ambient temperatures and very slowly evolves into Cl-derivative.

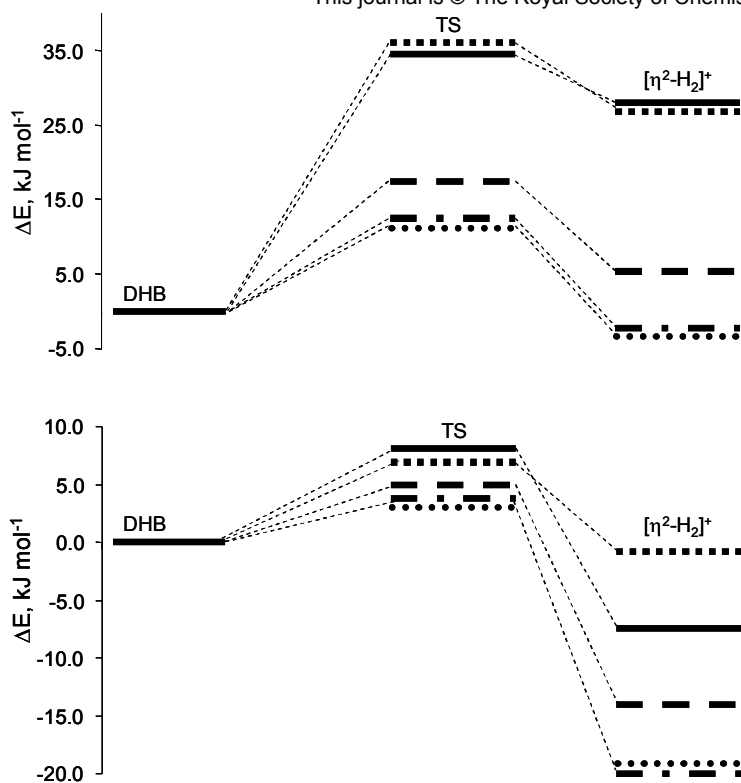

**Figure S1.** Potential energy curves for the proton transfer from  $\text{CF}_3\text{COOH}$  to **1** starting from the dihydrogen bonded complexes **B** (top) and **D** (bottom). Solid line -  $\Delta E$  gas phase, square dot -  $\Delta G$  gas phase, dash -  $\Delta G^{\text{solv}}$  toluene, dash dot -  $\Delta G^{\text{solv}}$   $\text{CH}_2\text{Cl}_2$ , dot -  $\Delta G^{\text{solv}}$  THF. Single point CPCM calculations.

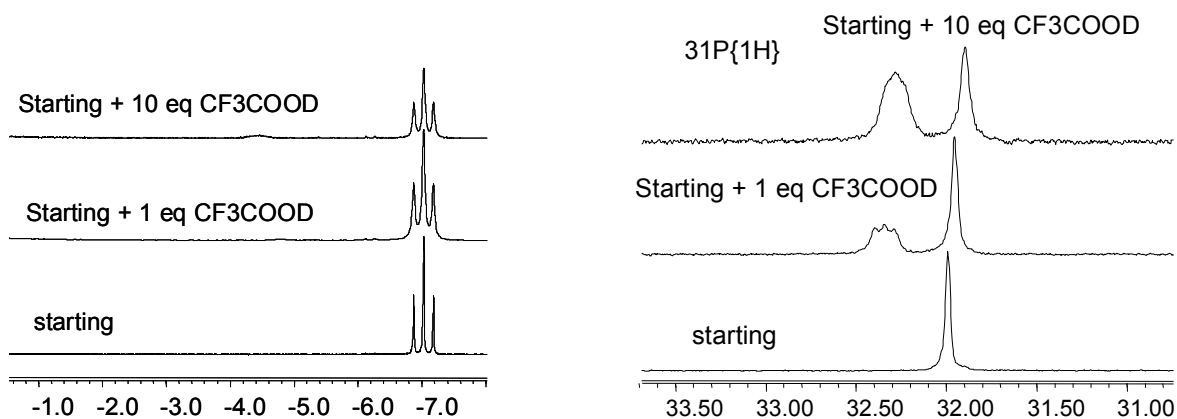

**Figure S2.** NMR spectra (hydride region on the left, phosphorus on the right) of  $\text{Cp}^*\text{MoH}(\text{PMe}_3)_2(\text{CO})$  in the presence of increasing amounts of  $\text{CF}_3\text{COOH}$ .

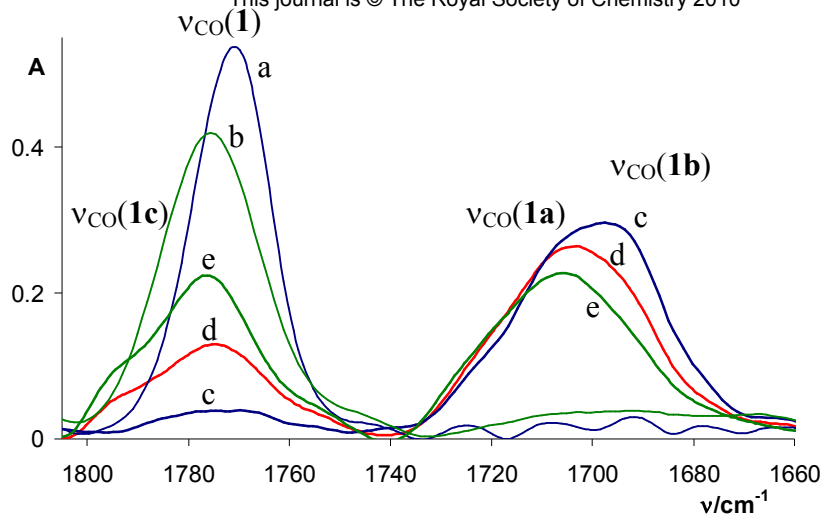

**Figure S3.** IR spectra ( $\nu_{\text{CO}}$  region) of  $\text{Cp}^*\text{Mo}(\text{PMe}_3)_2(\text{CO})\text{H}$  (**1**, 0.07 M) at 200 K (a) and 250 K (b), and **1** in the presence of 5 equiv. PFTB at 200K (c), 230K (d), 250K (e). Toluene,  $l = 0.04$  cm.

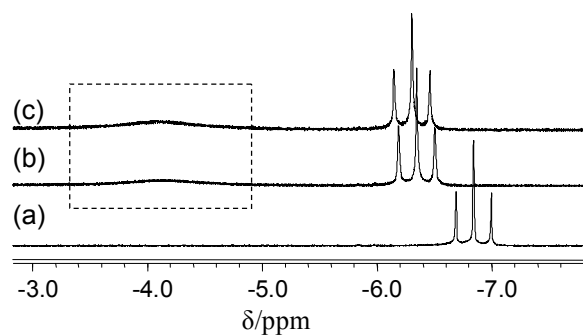

**Figure S4.**  $^1\text{H}$  NMR (500.3 MHz) spectrum (hydride region) of **1** (a), and of **1** in the presence of 3 equiv (b) or 5 equiv PFTB (c). 200K, toluene- $d_8$ .

**Table S2.** Geometrical parameters (distances in Å, angles in degrees) for H-complexes between **1** and proton donors.

| Proton donor          | H-complex notation | H-bond type             | d(H...H) | d(Mo...H) | d(CO...H) | $\Delta$ d(OH)      | H...HO | Mo...HO | CO...HO |
|-----------------------|--------------------|-------------------------|----------|-----------|-----------|---------------------|--------|---------|---------|
| CH <sub>3</sub> OH    | <b>A</b>           | CO...HOR                |          |           | 1.912     | 0.007               |        |         | 168.7   |
|                       | <b>B</b>           | H...HOR                 | 1.694    | 3.245     |           | 0.012               | 170.4  | 169.0   |         |
| 2CH <sub>3</sub> OH   | <b>C</b>           | CO...(HOR) <sub>2</sub> |          |           | 1.860     | 0.036               |        |         | 176.1   |
|                       | <b>D</b>           | H...(HOR) <sub>2</sub>  |          |           |           |                     |        |         |         |
|                       | <b>E</b>           | CO...HO &<br>H...HO     | 1.625    | 3.159     | 1.917     | 0.007<br>&<br>0.011 | 170.9  | 167.8   | 167.6   |
| CF <sub>3</sub> OH    | <b>A</b>           | CO...HOR                |          |           | 1.615     | 0.029               |        |         | 179.3   |
|                       | <b>B</b>           | H...HOR                 | 1.777    | 2.905     |           | 0.054               | 171.4  | 163.2   |         |
| CF <sub>3</sub> COOH  | <b>A</b>           | CO...HOR                |          |           | 1.638     | 0.028               |        |         | 170.4   |
|                       | <b>B</b>           | H...HOR                 | 1.365    | 3.000     |           | 0.048               | 177.7  | 163.2   |         |
| 2CF <sub>3</sub> COOH | <b>C</b>           | CO...(HOR) <sub>2</sub> |          |           |           |                     |        |         |         |
|                       | <b>D</b>           | H...(HOR) <sub>2</sub>  | 1.283    | 2.867     |           | 0.073               | 175.4  | 158.3   |         |
|                       | <b>E</b>           | CO...HO &<br>H...HO     | 1.391    | 2.981     | 1.660     | 0.025 &<br>0.043    | 176.8  | 161.3   | 170.8   |

**Table S3. XYZ coordinates for all the optimized geometries**

**a. free reactants**

1. **Cp\*MoH (CO) (PMe<sub>3</sub>)<sub>2</sub>** E = -824.080464629

|    |              |              |              |
|----|--------------|--------------|--------------|
| 6  | -1.699568000 | -1.411627000 | 0.196502000  |
| 6  | -1.050375000 | -1.376007000 | 1.478522000  |
| 6  | 0.362707000  | -1.257838000 | 1.249614000  |
| 6  | 0.587838000  | -1.211520000 | -0.162168000 |
| 6  | -0.681686000 | -1.315203000 | -0.812271000 |
| 42 | -0.769090000 | 0.763660000  | 0.470782000  |
| 15 | -1.545652000 | 2.066590000  | -1.450013000 |
| 15 | 0.267180000  | 2.162880000  | 2.188121000  |
| 1  | 0.412072000  | 1.897995000  | -0.139318000 |
| 6  | -2.344021000 | 1.580188000  | 1.235699000  |
| 8  | -3.325673000 | 2.045437000  | 1.713957000  |
| 1  | 0.379024000  | 4.510388000  | 2.971999000  |
| 6  | -1.766600000 | 3.898790000  | -1.210591000 |
| 1  | 0.279345000  | 4.402159000  | 1.192962000  |
| 6  | -0.095696000 | 3.987815000  | 2.132994000  |
| 6  | 1.933202000  | -1.216138000 | -0.842413000 |
| 1  | 2.682736000  | -0.670632000 | -0.260469000 |
| 1  | 2.306459000  | -2.241959000 | -0.980348000 |
| 1  | 1.887658000  | -0.748928000 | -1.831215000 |
| 6  | 1.437019000  | -1.430790000 | 2.291917000  |
| 1  | 1.144973000  | -1.022246000 | 3.264053000  |
| 1  | 1.651079000  | -2.498923000 | 2.445742000  |
| 1  | 2.376803000  | -0.955896000 | 1.993680000  |
| 6  | -1.711716000 | -1.656039000 | 2.804162000  |
| 1  | -2.743125000 | -1.290957000 | 2.824782000  |
| 1  | -1.739682000 | -2.736372000 | 3.012881000  |
| 1  | -1.181453000 | -1.177255000 | 3.633029000  |
| 6  | -3.153066000 | -1.733189000 | -0.042918000 |
| 1  | -3.514179000 | -1.307896000 | -0.984454000 |
| 1  | -3.316043000 | -2.820696000 | -0.090363000 |
| 1  | -3.788812000 | -1.340367000 | 0.756431000  |
| 6  | -0.887440000 | -1.551460000 | -2.286354000 |
| 1  | -0.084774000 | -1.112614000 | -2.887048000 |
| 1  | -0.898882000 | -2.629899000 | -2.503067000 |
| 1  | -1.837917000 | -1.144478000 | -2.644489000 |
| 1  | -0.807117000 | 4.346258000  | -0.936640000 |
| 1  | -1.177609000 | 4.143966000  | -2.176502000 |
| 6  | -0.178800000 | 1.817279000  | 3.968534000  |
| 1  | 0.320656000  | 2.516159000  | 4.650026000  |
| 1  | -1.263137000 | 1.911745000  | 4.086609000  |
| 1  | 0.107676000  | 0.795780000  | 4.237164000  |
| 6  | 2.128125000  | 2.223018000  | 2.306966000  |
| 1  | 2.449653000  | 2.913731000  | 3.095581000  |
| 1  | 2.525821000  | 1.227712000  | 2.524419000  |
| 1  | 2.534073000  | 2.554351000  | 1.346126000  |
| 6  | -3.222148000 | 1.648077000  | -2.156801000 |
| 1  | -3.478826000 | 2.306138000  | -2.995431000 |
| 1  | -3.234676000 | 0.610609000  | -2.503927000 |
| 1  | -3.975559000 | 1.755473000  | -1.369736000 |
| 6  | -0.509687000 | 2.074830000  | -3.001324000 |
| 1  | -0.957180000 | 2.710920000  | -3.774347000 |
| 1  | 0.489544000  | 2.448208000  | -2.756303000 |
| 1  | -0.411428000 | 1.058123000  | -3.392321000 |
| 1  | -2.139040000 | 4.374324000  | -2.125780000 |
| 1  | -2.478144000 | 4.074908000  | -0.398001000 |

2. **CH<sub>3</sub>OH** E = -115.713492021

|   |              |              |              |
|---|--------------|--------------|--------------|
| 8 | 0.759809000  | 0.121939000  | -0.000002000 |
| 1 | 1.156143000  | -0.758486000 | 0.000031000  |
| 6 | -0.679629000 | -0.020512000 | -0.000003000 |
| 1 | -1.082714000 | 0.993875000  | -0.000354000 |
| 1 | -1.037035000 | -0.544235000 | -0.895842000 |
| 1 | -1.037091000 | -0.543600000 | 0.896195000  |

3. **CF<sub>3</sub>OH** E = -413.382341244

|   |              |              |              |
|---|--------------|--------------|--------------|
| 8 | -1.182580000 | 0.699312000  | 0.003810000  |
| 1 | -1.918502000 | 0.066778000  | 0.004428000  |
| 6 | -0.012063000 | 0.031488000  | 0.000078000  |
| 9 | 1.015217000  | 0.939704000  | -0.004613000 |
| 9 | 0.132869000  | -0.793753000 | 1.114805000  |
| 9 | 0.124306000  | -0.795973000 | -1.114123000 |

4. **CF<sub>3</sub>COOH** E = -526.692246015

|   |              |              |              |
|---|--------------|--------------|--------------|
| 1 | -2.491064000 | -0.920180000 | 0.000070000  |
| 8 | -1.525823000 | -1.046975000 | -0.000038000 |
| 8 | -1.497266000 | 1.237559000  | -0.000036000 |
| 6 | -0.941044000 | 0.166836000  | -0.000091000 |
| 6 | 0.584132000  | 0.000025000  | -0.000033000 |
| 9 | 0.997894000  | -0.702835000 | -1.120616000 |

|   |             |              |              |
|---|-------------|--------------|--------------|
| 9 | 0.997897000 | -0.700509000 | 1.122048000  |
| 9 | 1.206124000 | 1.224938000  | -0.001291000 |

**b. hydrogen bonded complexes**

5. **[Cp\*Mo (CO) (PMe<sub>3</sub>)<sub>2</sub>H] · CF<sub>3</sub>OH (B)** E = -1237.48594451

|    |              |              |              |
|----|--------------|--------------|--------------|
| 6  | 2.698215000  | 0.714322000  | 0.892139000  |
| 6  | 2.697047000  | -0.723676000 | 0.888967000  |
| 6  | 1.651943000  | -1.162412000 | 1.773007000  |
| 6  | 1.006705000  | -0.006603000 | 2.314889000  |
| 6  | 1.653750000  | 1.150680000  | 1.778355000  |
| 42 | 0.701217000  | -0.000278000 | -0.152133000 |
| 15 | -0.224517000 | -2.004869000 | -1.081763000 |
| 15 | -0.235022000 | -2.099031000 | -1.087217000 |
| 1  | -1.074946000 | 0.005455000  | -0.109224000 |
| 6  | 1.440394000  | -0.000399000 | -1.933915000 |
| 8  | 1.954080000  | -0.000621000 | -3.001852000 |
| 1  | -1.650593000 | -2.883191000 | -2.953617000 |
| 6  | -1.305467000 | 1.922577000  | -2.581643000 |
| 1  | -2.195165000 | -1.309638000 | -2.313545000 |
| 6  | -1.319225000 | -1.906019000 | -2.583299000 |
| 6  | -0.048167000 | -0.004816700 | -3.391108000 |
| 1  | -0.696363000 | -0.886929000 | 3.327609000  |
| 1  | 0.412045000  | -0.010719000 | 4.390265000  |
| 1  | -0.694960000 | 0.871910000  | 3.331478000  |
| 6  | 1.446709000  | -2.573904000 | 2.258608000  |
| 1  | 1.662585000  | -3.317901000 | 1.485726000  |
| 1  | 2.118072000  | -2.785939000 | 3.103584000  |
| 1  | 0.424185000  | -2.739195000 | 2.611214000  |
| 6  | 3.768223000  | -1.591940000 | 0.279775000  |
| 1  | 4.125396000  | -1.186594000 | -0.671833000 |
| 1  | 4.636016000  | -1.672460000 | 0.951391000  |
| 1  | 3.409601000  | -2.607510000 | 0.089233000  |
| 6  | 3.771013000  | 1.583264000  | 0.286888000  |
| 1  | 3.414014000  | 2.600077000  | 0.100204000  |
| 1  | 4.638718000  | 1.659730000  | 0.959088000  |
| 1  | 4.127810000  | 1.181054000  | -0.666192000 |
| 6  | 1.450573000  | 2.560106000  | 2.270807000  |
| 1  | 0.426990000  | 2.726672000  | 2.619772000  |
| 1  | 2.118797000  | 2.765618000  | 3.119881000  |
| 1  | 1.672117000  | 3.307561000  | 1.502908000  |
| 1  | -2.182791000 | 1.325002000  | -2.318687000 |
| 1  | -0.767374000 | -1.388156000 | -3.372899000 |
| 6  | 0.989896000  | -3.355641000 | -1.713818000 |
| 1  | 0.476106000  | -4.201470000 | -2.187432000 |
| 1  | 1.655772000  | -2.883398000 | -2.442518000 |
| 1  | 1.597146000  | -3.734036000 | -0.885853000 |
| 6  | -1.331916000 | -3.181030000 | -0.040255000 |
| 1  | -1.620608000 | -4.081342000 | -0.595535000 |
| 1  | -0.813528000 | -3.479774000 | 0.873998000  |
| 1  | -2.235552000 | -2.630391000 | 0.230833000  |
| 6  | 1.005215000  | 3.360661000  | -1.700896000 |
| 1  | 0.494454000  | 4.204740000  | -2.178525000 |
| 1  | 1.606688000  | 3.740072000  | -0.869192000 |
| 1  | 1.675987000  | 2.888029000  | -2.424817000 |
| 6  | -1.319786000 | 3.185919000  | -0.032272000 |
| 1  | -1.601824000 | 4.091345000  | -0.582608000 |
| 1  | -2.227086000 | 2.638081000  | 0.232121000  |
| 1  | -0.802764000 | 3.475651000  | 0.885643000  |
| 1  | -1.634731000 | 2.902385000  | -2.946401000 |
| 1  | -0.752119000 | 1.409271000  | -3.373324000 |
| 1  | -2.020984000 | -0.002159000 | 0.863323000  |
| 8  | -2.836471000 | -0.007629000 | 1.482547000  |
| 6  | -3.954749000 | 0.002430000  | 0.784077000  |
| 9  | -5.053877000 | -0.007479000 | 1.619625000  |
| 9  | -4.084545000 | 1.128541000  | -0.056611000 |
| 9  | -4.086271000 | -1.101396000 | -0.085513000 |

6. **[Cp\*MoH (PMe<sub>3</sub>)<sub>2</sub> (CO)] · CF<sub>3</sub>OH (A) · E** = -1237.48653197

|    |              |              |              |
|----|--------------|--------------|--------------|
| 6  | -2.209999000 | 0.679475000  | 1.761467000  |
| 6  | -2.183232000 | -0.755995000 | 1.751003000  |
| 6  | -2.910616000 | -1.198614000 | 0.594068000  |
| 6  | -3.379366000 | -0.046599000 | -0.113018000 |
| 6  | -2.953733000 | 1.115870000  | 0.610962000  |
| 42 | -0.892168000 | -0.000468000 | -0.106405000 |
| 15 | 0.021389000  | 2.078125000  | -1.046609000 |
| 15 | 0.098627000  | -2.031527000 | -1.073280000 |
| 1  | -0.708522000 | 0.014107000  | -1.844722000 |
| 6  | 0.761014000  | 0.025664000  | 0.826513000  |
| 8  | 1.744011000  | 0.042693000  | 1.521674000  |
| 1  | 2.042935000  | -2.788703000 | -2.385588000 |
| 6  | 1.616352000  | 1.938487000  | -1.986182000 |
| 1  | 1.533154000  | -1.140630000 | -2.843810000 |
| 6  | 1.691380000  | -1.822806000 | -2.003928000 |

Electronic Supplementary Information for Dalton Transactions  
This journal is © The Royal Society of Chemistry 2010

|    |              |              |              |    |              |              |              |
|----|--------------|--------------|--------------|----|--------------|--------------|--------------|
| 6  | -4.297411000 | -0.054937000 | -1.309058000 | 1  | 2.032356000  | 4.058260000  | 0.228927000  |
| 1  | -4.125532000 | -0.928560000 | -1.945384000 | 1  | 0.700956000  | 3.539846000  | 1.289496000  |
| 1  | -5.352847000 | -0.076653000 | -0.999815000 | 1  | 2.193640000  | 2.589207000  | 1.235828000  |
| 1  | -4.158186000 | 0.833570000  | -0.132664000 | 6  | 0.281998000  | -3.351270000 | -1.738266000 |
| 6  | -3.339635000 | -2.618364000 | 0.329776000  | 1  | 0.984992000  | -4.163260000 | -1.960368000 |
| 1  | -2.560530000 | -3.344204000 | 0.582032000  | 1  | -0.554569000 | -3.756669000 | -1.161176000 |
| 1  | -4.219831000 | -2.868546000 | 0.939814000  | 1  | -0.111868000 | -2.949443000 | -2.677044000 |
| 1  | -3.620335000 | -2.772163000 | -0.716117000 | 6  | 1.923987000  | -2.953606000 | 0.580882000  |
| 6  | -1.686282000 | -1.632880000 | 2.871531000  | 1  | 2.579668000  | -3.730604000 | 0.170285000  |
| 1  | -0.824577000 | -1.189160000 | 3.379012000  | 1  | 2.507322000  | -2.280139000 | 1.215677000  |
| 1  | -2.470402000 | -1.790111000 | 3.627307000  | 1  | 1.162795000  | -3.430504000 | 1.204719000  |
| 1  | -1.379631000 | -2.618931000 | 2.510094000  | 1  | 3.104894000  | -2.612740000 | -2.108028000 |
| 6  | -1.746078000 | 1.557881000  | 2.894888000  | 1  | 2.240553000  | -1.224056000 | -2.826185000 |
| 1  | -1.471732000 | 2.558335000  | 2.547325000  | 1  | 2.256821000  | 0.106683000  | 1.839120000  |
| 1  | -2.537130000 | 1.678565000  | 3.650149000  | 8  | 2.887023000  | 0.097791000  | 2.587117000  |
| 1  | -0.871346000 | 1.136672000  | 3.399255000  | 6  | 4.217793000  | 0.275362000  | 2.066957000  |
| 6  | -3.435768000 | 2.518074000  | 0.368246000  | 1  | 4.894770000  | 0.239980000  | 2.924106000  |
| 1  | -3.724207000 | 2.676678000  | -0.674798000 | 1  | 4.497863000  | -0.524252000 | 1.366662000  |
| 1  | -4.323419000 | 2.726100000  | 0.983298000  | 1  | 4.339051000  | 1.245876000  | 1.565526000  |
| 1  | -2.683786000 | 3.268669000  | 0.630261000  |    |              |              |              |
| 1  | 1.474151000  | 1.272999000  | -2.842262000 |    |              |              |              |
| 1  | 2.458901000  | -1.400466000 | -1.350863000 |    |              |              |              |
| 6  | 0.591874000  | -3.392710000 | 0.103076000  | 6  | -1.883245000 | 0.717150000  | 1.636568000  |
| 1  | 1.065453000  | -4.225402000 | -0.429969000 | 6  | -1.882139000 | -0.719693000 | 1.636180000  |
| 1  | 1.297477000  | -2.988973000 | 0.836240000  | 6  | -2.493776000 | -1.157169000 | 0.412732000  |
| 1  | -0.282955000 | -3.769389000 | 0.641999000  | 6  | -2.862548000 | -0.001443000 | -0.344746000 |
| 6  | -0.881872000 | -2.988849000 | -2.336907000 | 6  | -2.495307000 | 1.154447000  | 0.413306000  |
| 1  | -0.292242000 | -3.823126000 | -2.734827000 | 42 | -0.389399000 | 0.000133000  | -0.079587000 |
| 1  | -1.797838000 | -3.386852000 | -1.892228000 | 15 | 0.683581000  | 2.034937000  | -0.932933000 |
| 1  | -1.155720000 | -2.316907000 | -3.156275000 | 15 | 0.685782000  | -2.033235000 | -0.933639000 |
| 6  | 0.470555000  | 3.439953000  | 0.146538000  | 1  | -0.077597000 | 0.000464000  | -1.795391000 |
| 1  | 0.916441000  | 4.293956000  | -0.376584000 | 6  | 1.184167000  | 0.000520000  | 1.009058000  |
| 1  | -0.416024000 | 3.781679000  | 0.689501000  | 8  | 2.128079000  | 0.000414000  | 1.744202000  |
| 1  | 1.189037000  | 3.050914000  | 0.875081000  | 1  | 2.776211000  | -2.835140000 | -1.972094000 |
| 6  | -0.997641000 | 3.017735000  | -2.292757000 | 6  | 2.388659000  | 1.863691000  | -1.651338000 |
| 1  | -0.440098000 | 3.878604000  | -2.680131000 | 1  | 2.345591000  | -1.194554000 | -2.521990000 |
| 1  | -1.250176000 | 2.348432000  | -3.121087000 | 6  | 2.389538000  | -1.859284000 | -1.654477000 |
| 1  | -1.925618000 | 3.375254000  | -1.838647000 | 6  | -3.648409000 | -0.001543000 | -1.631473000 |
| 1  | 1.938977000  | 2.922934000  | -2.345355000 | 1  | -3.426282000 | -0.882675000 | -2.241693000 |
| 1  | 2.397642000  | 1.521118000  | -1.346351000 | 1  | -4.731148000 | -0.002196000 | -1.435895000 |
| 1  | 3.351295000  | 0.081292000  | 1.675194000  | 1  | -3.427300000 | 0.880224000  | -2.241149000 |
| 8  | 4.344565000  | 0.103312000  | 1.781414000  | 6  | -2.913695000 | -2.570653000 | 0.100827000  |
| 6  | 4.936440000  | 0.014481000  | 0.606503000  | 1  | -2.213268000 | -3.210563000 | 0.500423000  |
| 9  | 6.307071000  | 0.034741000  | 0.749968000  | 1  | -3.895392000 | -2.785153000 | 0.548516000  |
| 9  | 4.609423000  | -1.163032000 | -0.098415000 | 1  | -3.008148000 | -2.742787000 | -0.975817000 |
| 9  | 4.596120000  | 1.062962000  | -0.274047999 | 6  | -1.525879000 | -1.525879000 | -2.810912000 |
|    |              |              |              | 1  | -0.707986000 | -1.167244000 | 3.398494000  |
|    |              |              |              | 1  | -2.386486000 | -1.721296000 | 3.485211000  |
|    |              |              |              | 1  | -1.211130000 | -2.493837000 | 2.493837000  |
|    |              |              |              | 6  | -1.527968000 | 1.592372000  | 2.811891000  |
| 6  | -2.413349000 | -0.904388000 | 0.210928000  | 6  | -1.216007000 | 2.592586000  | 2.495713000  |
| 6  | -2.527007000 | 0.528259000  | 0.214983000  | 1  | -2.388262000 | 1.715590000  | 3.487134000  |
| 6  | -1.813227000 | 1.020043000  | 1.361234000  | 1  | -0.708513000 | 1.165781000  | 3.398286000  |
| 6  | -1.256647000 | -0.097287000 | 2.059880000  | 1  | -2.917449000 | 2.567480000  | 0.101937000  |
| 6  | -1.630742000 | -1.284268000 | 1.355000000  | 1  | -3.008754000 | 2.740914000  | -0.974758000 |
| 42 | -0.255903000 | -0.014005000 | -0.210624000 | 1  | -3.901136000 | 2.779011000  | 0.546641000  |
| 15 | 1.110174000  | -1.978692000 | -0.785861000 | 1  | -2.220048000 | 3.300300000  | 0.504994000  |
| 15 | 0.802575000  | 2.141433000  | -0.740822000 | 1  | 2.347524000  | 1.197404000  | -2.517768000 |
| 1  | 1.397384000  | 0.109659000  | 0.379855000  | 1  | 3.076078000  | -1.424219000 | -0.922101000 |
| 6  | -0.413129000 | -0.007160000 | -1.234922000 | 6  | 0.988001000  | -3.419632000 | -0.279028000 |
| 8  | -0.557211000 | -0.006052000 | -3.312620000 | 1  | 1.503963000  | -4.261376000 | -0.197646000 |
| 1  | 2.653874000  | 3.092738000  | -2.081940000 | 1  | 1.601427000  | -3.042450000 | 1.103711000  |
| 6  | 2.577822000  | -1.676778000 | -1.888351000 | 1  | 0.038228000  | -3.774252000 | 0.691433000  |
| 1  | 3.071001000  | 1.495029000  | -1.401663000 | 6  | -0.144275000 | -2.958602000 | -2.323392000 |
| 6  | 2.278553000  | 2.084115000  | -1.871960000 | 1  | 0.453741000  | -3.824199000 | -2.632210000 |
| 6  | -0.550958000 | -0.047048000 | 3.390854000  | 1  | -1.133642000 | -3.304247000 | -2.013042000 |
| 1  | -0.000504000 | 0.888226000  | 3.526975000  | 1  | -0.266425000 | -2.281155000 | -3.174344000 |
| 1  | -1.270126000 | -0.129740000 | 4.219611000  | 1  | 0.981608000  | 3.422008000  | 0.279905000  |
| 1  | 0.173609000  | -0.858780000 | 3.502090000  | 6  | 1.495788000  | 4.265141000  | -0.196225000 |
| 6  | -1.862623000 | 2.431840000  | 1.886140000  | 1  | 0.030610000  | 3.774121000  | 0.691565000  |
| 1  | -1.912174000 | 3.172970000  | 1.082304000  | 1  | 1.595333000  | 3.046197000  | 1.104998000  |
| 1  | -2.757128000 | 2.575944000  | 2.509912000  | 6  | -0.146558000 | 2.958163000  | -2.323981000 |
| 1  | -0.994787000 | 2.666327000  | 2.510158000  | 1  | 0.448067000  | 3.827090000  | -2.629971000 |
| 6  | -3.442457000 | 1.331183000  | -0.674330000 | 1  | -0.262942000 | 2.281179000  | -3.176106000 |
| 1  | -3.485101000 | 0.919033000  | -1.687215000 | 1  | -1.138540000 | 3.298250000  | -2.015900000 |
| 1  | -4.468855000 | 1.338238000  | -0.277281000 | 1  | 2.773817000  | 2.839826000  | -1.969924000 |
| 1  | -3.120427000 | 2.373514000  | -0.758775000 | 1  | 3.074974000  | 1.431135000  | -0.917243000 |
| 6  | -3.189692000 | -1.837956000 | -0.682808000 | 1  | 3.925099000  | 0.000633000  | 1.090787000  |
| 1  | -2.698162000 | -2.810479000 | -0.780731000 | 6  | 4.756821000  | 0.001749000  | 0.585368000  |
| 1  | -4.197976000 | -2.020653000 | -0.281292000 | 8  | 5.858637000  | 0.000159000  | 1.514302000  |
| 1  | -3.306402000 | -1.427951000 | -1.690715000 | 6  | 6.773565000  | 0.001673000  | 0.916728000  |
| 6  | -1.467767000 | -2.687350000 | 1.878681000  | 1  | 5.853700000  | 0.893208000  | 2.153878000  |
| 1  | -0.578798000 | -2.784632000 | 2.508380000  | 1  | 5.854237000  | -0.895581000 | 2.150144000  |
| 1  | -2.334260000 | -2.965947000 | 2.496450000  |    |              |              |              |
| 1  | -1.398359000 | -3.427836000 | 1.075874000  |    |              |              |              |
| 1  | 3.264351000  | -0.982974000 | -1.394949000 |    |              |              |              |
| 1  | 1.996240000  | 1.599812000  | -2.811373000 |    |              |              |              |
| 6  | -0.232016000 | 3.407928000  | -1.639228000 | 6  | 1.242805000  | -2.258152000 | -0.765124000 |
| 1  | 0.346206000  | 4.314120000  | -1.854752000 | 6  | 1.876414000  | -1.278017000 | -1.604215000 |
| 1  | -0.588614000 | 2.974436000  | -2.578993000 | 6  | 0.842757000  | -0.573803000 | -2.309689000 |
| 1  | -1.102586000 | 3.678852000  | -1.033922000 | 6  | -0.422156000 | -1.107691000 | -1.909360000 |
| 6  | 1.502886000  | 3.188150000  | 0.635144000  | 6  | -0.178364000 | -2.148768000 | -0.959352000 |

8. [Cp\*MoH (PMe<sub>3</sub>)<sub>2</sub>(CO)] · CH<sub>3</sub>OH (A) · E = -939.803648099

7. [Cp\*Mo(CO) (PMe<sub>3</sub>)<sub>2</sub>H] · CH<sub>3</sub>OH (B) E = -939.801647124

9. [Cp\*Mo(CO) (PMe<sub>3</sub>)<sub>2</sub>H] · (CH<sub>3</sub>OH)<sub>2</sub> (D) E = -1055.52783486

Electronic Supplementary Information for Dalton Transactions  
 This journal is © The Royal Society of Chemistry 2010

|    |              |              |              |                                                                                                |                |              |              |
|----|--------------|--------------|--------------|------------------------------------------------------------------------------------------------|----------------|--------------|--------------|
| 42 | 0.680524000  | -0.123549000 | 0.091906000  | 1                                                                                              | -1.456225000   | 1.387214000  | -3.232551000 |
| 15 | -0.390753000 | -0.653822000 | 2.254046000  | 6                                                                                              | 1.476248000    | -1.437048000 | -2.173314000 |
| 15 | 1.298443000  | 2.240448000  | -0.202133000 | 1                                                                                              | 2.141789000    | -1.856411000 | -1.414269000 |
| 1  | -0.663451000 | 0.963668000  | 0.453005000  | 1                                                                                              | 1.571629000    | -2.059933000 | -3.075556000 |
| 6  | 2.188416000  | 0.007633000  | 1.290785000  | 1                                                                                              | 1.865376000    | -0.444743000 | -2.419244000 |
| 8  | 3.139306000  | 0.050511000  | 1.998765000  | 6                                                                                              | -0.016479000   | -3.595740000 | -0.342779000 |
| 1  | 1.555392000  | 4.337320000  | 1.090831000  | 1                                                                                              | -0.510132000   | -3.937557000 | 0.572386000  |
| 6  | -0.234993000 | 0.642958000  | 3.578989000  | 1                                                                                              | -0.113770000   | -4.404928000 | -1.081499000 |
| 1  | 0.230479000  | 3.319941000  | 1.722916000  | 1                                                                                              | 1.050547000    | -3.483119000 | -0.132746000 |
| 6  | 1.247215000  | 3.310193000  | 1.319960000  | 1                                                                                              | -0.092170000   | 1.020980000  | 3.759891000  |
| 6  | -1.756523000 | -0.768159000 | -2.521993000 | 1                                                                                              | -0.652202000   | 3.269913000  | 1.872794000  |
| 1  | -1.805438000 | 0.277904000  | -2.840239000 | 6                                                                                              | -2.240738000   | 3.181000000  | -0.798145000 |
| 1  | -1.943063000 | -1.389319000 | -3.411262000 | 1                                                                                              | -2.836019000   | 4.047450000  | -0.486366000 |
| 1  | -2.583550000 | -0.937251000 | -1.826450000 | 1                                                                                              | -1.220046000   | 3.505055000  | -1.025158000 |
| 6  | 1.058646000  | 0.368209000  | -3.465740000 | 1                                                                                              | -2.678021000   | 2.760841000  | -1.709252000 |
| 1  | 1.959723000  | 0.977285000  | -3.344166000 | 6                                                                                              | -3.987994000   | 1.660895000  | 0.904357000  |
| 1  | 1.179866000  | -0.198584000 | -4.400705000 | 1                                                                                              | -4.469883000   | 2.624629000  | 1.107309000  |
| 1  | 0.208954000  | 1.042523000  | -3.607834000 | 1                                                                                              | -4.487408000   | 1.186902000  | 0.055051000  |
| 6  | 3.356310000  | -1.185406000 | -1.875986000 | 1                                                                                              | -1.096779000   | 1.009104000  | 1.776866000  |
| 1  | 3.945736000  | -1.426760000 | -0.986277000 | 6                                                                                              | 2.240074000    | -1.442059000 | 1.839558000  |
| 1  | 3.654631000  | -1.886459000 | -2.670178000 | 1                                                                                              | 2.743407000    | -1.612094000 | 2.798949000  |
| 1  | 3.649853000  | -0.182475000 | -2.200575000 | 1                                                                                              | 2.203497000    | -2.388764000 | 1.293146000  |
| 6  | 1.954762000  | -3.365783000 | -0.030691000 | 1                                                                                              | 2.830774000    | -0.741323000 | 1.242727000  |
| 1  | 1.364992000  | -3.741567000 | 0.810027000  | 6                                                                                              | -0.194695000   | -2.114574000 | 3.198497000  |
| 1  | 2.150758000  | -4.217545000 | -0.699364000 | 1                                                                                              | 0.489595000    | -2.359920000 | 4.020513000  |
| 1  | 2.917637000  | -3.032240000 | 0.367932000  | 1                                                                                              | -1.148751000   | -1.767950000 | 3.607431000  |
| 6  | -1.213155000 | -3.129198000 | -0.470584000 | 1                                                                                              | -0.380631000   | -3.019745000 | 2.613208000  |
| 1  | -2.207752000 | -2.677614000 | -0.412164000 | 1                                                                                              | 1.448707000    | 0.126506000  | 4.203062000  |
| 1  | -1.284791000 | -3.981749000 | -1.162219000 | 1                                                                                              | 1.401678000    | 1.354095000  | 2.907117000  |
| 1  | -0.965826000 | -3.538941000 | 0.513663000  | 1                                                                                              | 3.240837000    | 2.053079000  | -0.236459000 |
| 1  | -0.707353000 | 1.568085000  | 3.236314000  | 8                                                                                              | 4.196302000    | 2.002960000  | -0.430738000 |
| 1  | 1.917053000  | 2.894106000  | 2.078472000  | 1                                                                                              | 4.191385000    | 3.880413000  | -1.379290000 |
| 6  | 3.030690000  | 2.616189000  | -0.783095000 | 1                                                                                              | 3.935911000    | 2.482980000  | -2.469657000 |
| 1  | 3.210413000  | 3.697155000  | -0.819073000 | 6                                                                                              | 4.468546000    | 2.838274000  | -1.578898000 |
| 1  | 3.745933000  | 2.154427000  | -0.095184000 | 1                                                                                              | 5.544353000    | 2.784915000  | -1.761103000 |
| 1  | 3.194517000  | 2.198122000  | -1.781171000 | 1                                                                                              | 4.664495000    | 0.248251000  | -0.586463000 |
| 6  | 0.309657000  | 3.303600000  | -1.373609000 | 8                                                                                              | 4.903965000    | -0.700662000 | -0.637590000 |
| 1  | 0.648129000  | 4.345938000  | -1.337775000 | 6                                                                                              | 6.253559000    | -0.849118000 | -0.163519000 |
| 1  | 0.418564000  | 2.932858000  | -2.396316000 | 1                                                                                              | 6.973683000    | -0.312366000 | -0.797850000 |
| 1  | -0.750204000 | 3.254719000  | -1.106795000 | 1                                                                                              | 6.489550000    | -1.916308000 | -0.199437000 |
| 6  | 0.262203000  | -2.133479000 | 3.181414000  | 1                                                                                              | 6.366033000    | -0.498658000 | 0.872045000  |
| 1  | -0.221002000 | -2.230917000 | 4.160600000  |                                                                                                |                |              |              |
| 1  | 0.079589000  | -3.046048000 | 2.606017000  | 11. [Cp*MoH (PMe <sub>3</sub> ) <sub>2</sub> (CO)] · (CH <sub>3</sub> OH) <sub>2</sub> (E) E = | -1055.52476928 |              |              |
| 1  | 1.342115000  | -2.022211000 | 3.319521000  |                                                                                                |                |              |              |
| 6  | -2.222274000 | -0.982625000 | 2.335502000  | 6                                                                                              | -1.622965000   | -2.242838000 | -0.125023000 |
| 1  | -2.533708000 | -1.177393000 | 3.368718000  | 6                                                                                              | -1.603232000   | -1.702910000 | -1.456483000 |
| 1  | -2.774102000 | -0.120988000 | 1.950378000  | 6                                                                                              | -2.340532000   | -0.468777000 | -1.437838000 |
| 1  | -2.487188000 | -1.844440000 | 1.718413000  | 6                                                                                              | -2.809895000   | -0.243597000 | -0.105761000 |
| 1  | -0.712670000 | 0.316218000  | 4.510212000  | 6                                                                                              | -2.372925000   | -1.340306000 | 0.702352000  |
| 1  | 0.823886000  | 0.843033000  | 3.767520000  | 42                                                                                             | -0.320159000   | -0.252110000 | -0.084599000 |
| 1  | -2.121305000 | 1.410365000  | -0.098297000 | 15                                                                                             | 0.599249000    | -0.114641000 | 2.198292000  |
| 8  | -3.015554000 | 1.762752000  | -0.308298000 | 15                                                                                             | 0.738190000    | 1.295768000  | -1.693422000 |
| 1  | -2.663242000 | 3.573327000  | 0.709882000  | 1                                                                                              | -0.160296000   | 1.390847000  | 0.520582000  |
| 1  | -3.443794000 | 2.295182000  | 1.691424000  | 6                                                                                              | 1.352577000    | -1.141897000 | -0.347783000 |
| 6  | -3.378643000 | 2.741638000  | 0.691282000  | 8                                                                                              | 2.363699000    | -1.755234000 | -0.527148000 |
| 1  | -4.361537000 | 3.126610000  | 0.410789000  | 1                                                                                              | 2.712440000    | 2.754326000  | -1.936519000 |
| 1  | -4.181219000 | 0.342557000  | -0.398072000 | 6                                                                                              | 2.197562000    | 2.093320000  | 2.403617000  |
| 8  | -4.774308000 | -0.436107000 | -0.402958000 | 1                                                                                              | 2.126797000    | 2.698617000  | -0.251536000 |
| 6  | -5.751438000 | -0.254497000 | -1.443788000 | 6                                                                                              | 2.320626000    | 2.101180000  | -1.147354000 |
| 1  | -6.381198000 | 0.628637000  | -1.265724000 | 6                                                                                              | -3.740158000   | 0.860624000  | 0.326665000  |
| 1  | -6.389185000 | -1.142339000 | -1.439912000 | 1                                                                                              | -3.548747000   | 1.793300000  | -0.211495000 |
| 1  | -5.283540000 | -0.161806000 | -2.433963000 | 1                                                                                              | -4.789574000   | 0.583380000  | 0.145946000  |
|    |              |              |              | 1                                                                                              | -3.639829000   | 1.085132000  | 1.392485000  |
|    |              |              |              | 6                                                                                              | -2.782991000   | 0.308481000  | -2.650325000 |
|    |              |              |              | 1                                                                                              | -2.043534000   | 0.278220000  | -3.456651000 |
|    |              |              |              | 1                                                                                              | -3.715039000   | -0.113758000 | -3.054148000 |
| 6  | 0.041393000  | -1.370340000 | -1.715701000 | 1                                                                                              | -2.982042000   | 1.357052000  | -2.410652000 |
| 6  | -0.950916000 | -0.458546000 | -2.212850000 | 1                                                                                              | -1.123376000   | -2.433463000 | -2.684922000 |
| 6  | -2.224101000 | -0.862233000 | -1.680622000 | 6                                                                                              | -0.243376000   | -3.047689000 | -2.471069000 |
| 6  | -2.020726000 | -2.008580000 | -0.850255000 | 1                                                                                              | -1.905703000   | -3.101745000 | -3.075513000 |
| 6  | -0.625863000 | -2.326543000 | -0.878617000 | 1                                                                                              | -0.853318000   | -1.743983000 | -3.490463000 |
| 42 | -0.788179000 | -0.094989000 | 0.135267000  | 1                                                                                              | -1.155356000   | -3.622360000 | 0.263185000  |
| 15 | 0.516139000  | -0.785366000 | 2.102075000  | 6                                                                                              | -0.946284000   | -3.694032000 | 1.334558000  |
| 15 | -2.172619000 | 1.883463000  | 0.541722000  | 1                                                                                              | -1.920356000   | -4.377482000 | 0.027510000  |
| 1  | -1.682566000 | -0.118376000 | 1.635533000  | 1                                                                                              | -0.240853000   | -3.903985000 | -0.267426000 |
| 6  | 0.557976000  | 1.259320000  | 0.090985000  | 1                                                                                              | -2.851351000   | -1.633853000 | 2.100535000  |
| 8  | 1.398974000  | 2.110646000  | 0.015591000  | 6                                                                                              | -3.097426000   | -0.720205000 | 2.649222000  |
| 1  | -2.337574000 | 3.832815000  | 2.059425000  | 1                                                                                              | -3.765279000   | -2.245034000 | 2.067191000  |
| 6  | 0.855805000  | 0.528352000  | 3.372968000  | 1                                                                                              | -2.115215000   | -2.193959000 | 2.685223000  |
| 1  | -1.777189000 | 2.365683000  | 2.907908000  | 1                                                                                              | 2.055442000    | 1.848724000  | 2.091094000  |
| 6  | -1.691942000 | 2.949547000  | 1.986988000  | 1                                                                                              | 3.074582000    | 1.347379000  | -0.901791000 |
| 6  | -3.101603000 | -2.836261000 | -0.202918000 | 1                                                                                              | 1.273941000    | 0.591814000  | -3.334666000 |
| 1  | -3.964443000 | -2.225820000 | 0.081447000  | 6                                                                                              | 1.784272000    | 1.249196000  | -3.940958000 |
| 1  | -3.464050000 | -3.620140000 | -0.884800000 | 1                                                                                              | 1.953658000    | -0.247915000 | -3.160995000 |
| 1  | -2.741996000 | -3.333494000 | 0.703493000  | 1                                                                                              | 0.404230000    | 0.222981000  | -3.887199000 |
| 6  | -3.566600000 | -0.350401000 | -2.135079000 | 1                                                                                              | -0.204977000   | 2.801106000  | -2.262362000 |
| 1  | -3.547690000 | 0.717074000  | -2.375008000 | 6                                                                                              | -0.437719000   | 3.447737000  | -2.871672000 |
| 1  | -3.886495000 | -0.877248000 | -3.046246000 | 1                                                                                              | -1.069734000   | 2.503439000  | -2.861114000 |
| 6  | -4.342854000 | -0.513376000 | -1.381207000 | 1                                                                                              | -0.567163000   | 3.360314000  | -1.394444000 |
| 1  | -0.730551000 | 0.570528000  | -3.292780000 | 1                                                                                              | -1.045123000   | 1.718899000  | -3.038390000 |
| 1  | 0.267461000  | 1.014559000  | -3.227174000 | 6                                                                                              | 1.459020000    | -1.541609000 | 4.037729000  |
| 1  | -0.825382000 | 0.120390000  | -4.292499000 |                                                                                                |                |              |              |



Electronic Supplementary Information for Dalton Transactions  
This journal is © The Royal Society of Chemistry 2010

|   |              |              |              |    |              |              |              |
|---|--------------|--------------|--------------|----|--------------|--------------|--------------|
| 1 | 0.161455000  | -2.358219000 | 3.129634000  | 6  | -1.796019000 | 1.128850000  | 1.944313000  |
| 1 | 1.787551000  | -2.244233000 | 2.429202000  | 6  | -1.070522000 | -0.029219000 | 2.366737000  |
| 6 | -0.418522000 | 0.706136000  | 3.527429000  | 6  | -1.784812000 | -1.183605000 | 1.915842000  |
| 0 | 0.139268000  | 0.753463000  | 4.470218000  | 42 | -1.135233000 | 0.001262000  | -0.112002000 |
| 1 | -0.681424000 | 1.719773000  | 3.209689000  | 15 | -0.296197000 | -2.066294000 | -1.191986000 |
| 1 | -1.345987000 | 0.151924000  | 3.693166000  | 15 | -0.310795000 | 2.099479000  | -1.144849000 |
| 1 | 2.522255000  | 0.791057000  | 3.450752000  | 1  | 0.623075000  | 0.009199000  | -0.295027000 |
| 1 | 2.979296000  | 0.368328000  | 1.778463000  | 6  | -2.128485000 | 0.017435000  | -1.769869000 |
| 1 | -1.161213000 | 2.719224000  | 0.905961000  | 8  | -2.790162000 | 0.026323000  | -2.752241000 |
| 8 | -1.602197000 | 3.561494000  | 1.132925000  | 1  | 0.884454000  | 2.888105000  | -3.156135000 |
| 6 | -0.594692000 | 4.521600000  | 1.504452000  | 6  | 0.603816000  | -1.836508000 | -2.800713000 |
| 1 | -1.121827000 | 5.448229000  | 1.744422000  | 1  | 1.497851000  | 1.308664000  | -2.592937000 |
| 1 | -0.027149000 | 4.202230000  | 2.389530000  | 6  | 0.598153000  | 1.309533000  | -2.753526000 |
| 1 | 0.108232000  | 4.720997000  | 0.683490000  | 6  | 0.140646000  | -0.034094000 | 3.264397000  |
| 1 | 4.073465000  | -0.933034000 | -0.258760000 | 1  | 0.766963000  | 0.849691000  | 3.110438000  |
| 8 | 4.827386000  | -0.351232000 | -0.059285000 | 1  | -0.155659000 | -0.044891000 | 4.323694000  |
| 1 | 6.143731000  | -1.964333000 | 0.290862000  | 1  | 0.772136000  | -0.911074000 | 3.093793000  |
| 6 | 6.048017000  | -1.066716000 | -0.334799000 | 6  | -1.529372000 | 2.537549000  | 2.405383000  |
| 6 | 6.870443000  | -0.386489000 | -0.100598000 | 1  | -1.854722000 | 3.281975000  | 1.672230000  |
| 1 | 6.120267000  | -1.356997000 | -1.391621000 | 1  | -2.075965000 | 2.744394000  | 3.337127000  |

12. [Cp\*Mo(CO)(PMe<sub>3</sub>)<sub>2</sub>H]·CF<sub>3</sub>COOH (A) E = -1350.79302651

|    |              |              |              |   |              |              |              |
|----|--------------|--------------|--------------|---|--------------|--------------|--------------|
| 6  | -0.544666000 | -0.731890000 | -2.059776000 | 1 | -4.625733000 | 1.154973000  | -0.082351000 |
| 6  | -0.540763000 | 0.704200000  | -2.068380000 | 1 | -4.854123000 | 1.663918000  | 1.597149000  |
| 6  | -1.907683000 | 1.145018000  | -2.026619000 | 6 | -3.781793000 | 2.577255000  | 0.529679000  |
| 6  | -2.754104000 | -0.007233000 | -1.982963000 | 1 | -4.095732000 | -1.616159000 | 0.750972000  |
| 6  | -1.914004000 | -1.164531000 | -2.013444000 | 1 | -3.756458000 | -2.617626000 | 0.470612000  |
| 42 | -1.348402000 | 0.001329000  | 0.065123000  | 1 | -4.840131000 | -4.840131000 | 1.552437000  |
| 15 | -1.607446000 | -2.046667000 | 1.390121000  | 6 | -4.610285000 | -1.190457000 | -0.115608000 |
| 15 | -1.596412000 | 2.066021000  | 1.367524000  | 1 | -1.505005000 | -2.600753000 | 2.342631000  |
| 1  | -2.707050000 | 0.010860000  | 1.166057000  | 1 | -0.443000000 | -2.762695000 | 2.548551000  |
| 6  | 0.310887000  | 0.002816000  | 0.986782000  | 1 | -2.053189000 | -2.836535000 | 3.266499000  |
| 8  | 1.372723000  | 0.003788000  | 1.559244000  | 1 | -1.819577000 | -3.329875000 | 1.589661000  |
| 1  | -1.509426000 | 2.880822000  | 3.699393000  | 1 | 1.496901000  | -1.227472000 | -2.634298000 |
| 6  | -1.424613000 | -1.865559000 | 3.230151000  | 6 | -0.043071000 | 1.397750000  | -3.477069000 |
| 1  | -2.187637000 | 1.232605000  | 3.591951000  | 1 | -1.575657000 | 3.379829000  | -1.626830000 |
| 6  | -1.414593000 | 1.904824000  | 3.209483000  | 1 | -1.100619000 | 4.225317000  | -2.137642000 |
| 6  | -4.259574000 | -0.003659000 | -2.066085000 | 1 | -2.311822000 | 2.922920000  | -2.295370000 |
| 1  | -4.689870000 | 0.882011000  | -1.588244000 | 6 | -2.098921000 | 3.752047000  | -0.714077000 |
| 1  | -4.599451000 | -0.009602000 | -3.112311000 | 1 | -0.910015000 | 3.150109000  | -0.213401000 |
| 1  | -4.694895000 | -0.880484000 | -1.576628000 | 1 | 1.235056000  | 4.005132000  | -0.830105000 |
| 6  | -2.376541000 | 2.555544000  | -2.274481000 | 1 | 0.458801000  | 3.545141000  | 0.704482000  |
| 1  | -1.715185000 | 3.303157000  | -1.826326000 | 1 | 1.784173000  | 2.560085000  | 0.057374000  |
| 1  | -2.401890000 | 2.759998000  | -3.354831000 | 6 | -1.552873000 | -3.346825000 | -1.695044000 |
| 1  | -3.388264000 | 2.724639000  | -1.893546000 | 1 | -1.073133000 | -4.179714000 | -2.221925000 |
| 6  | 0.660592000  | 1.579056000  | -2.322549000 | 1 | -2.072371000 | -3.738247000 | -0.814870000 |
| 1  | 1.577083000  | 1.134313000  | -1.926055000 | 6 | -2.293239000 | -2.882721000 | -2.353894000 |
| 1  | 0.809868000  | 1.732518000  | -3.401858000 | 1 | 0.936544000  | -3.134680000 | -0.286676000 |
| 1  | 0.547578000  | 2.567929000  | -1.866593000 | 1 | 1.2656771000 | -3.923322000 | -0.921332000 |
| 6  | 0.651867000  | -1.616519000 | -2.302929000 | 1 | 1.806862000  | -2.534880000 | -0.005623000 |
| 1  | 0.532283000  | -2.599872000 | -1.836761000 | 1 | 0.491097000  | -3.542289000 | 0.624552000  |
| 1  | 0.801742000  | -1.782243000 | -3.380341000 | 1 | 0.899782000  | -2.804575000 | -3.221772000 |
| 1  | 1.570475000  | -1.173219000 | -1.909780000 | 1 | -0.046922000 | -1.320237000 | -3.512431000 |
| 6  | -2.390370000 | -2.575276000 | -2.245152000 | 8 | 1.830504000  | 0.011220000  | 0.342428000  |
| 1  | -3.403108000 | -2.734840000 | -1.862765000 | 6 | 2.752556000  | -0.004324000 | 0.782749000  |
| 1  | -2.416340000 | -2.792095000 | -3.323075000 | 6 | 3.713686000  | 0.029650000  | -0.131615000 |
| 1  | -1.733065000 | -3.321016000 | -1.788075000 | 6 | 5.087645000  | -0.007447000 | 0.558876000  |
| 1  | -2.194762000 | -1.185809000 | 3.605041000  | 9 | 5.214960000  | 1.025835000  | 1.477149000  |
| 1  | -0.434679000 | 1.478325000  | 3.442798000  | 9 | 6.109039000  | 0.108603000  | -0.356322000 |
| 6  | -0.372600000 | 3.436253000  | 1.046820000  | 9 | 5.259208000  | -1.204018000 | 1.243851000  |
| 1  | -0.551387000 | 4.294109000  | 1.705573000  | 8 | 3.605405000  | 0.072977000  | -1.340304000 |

14. [Cp\*Mo(CO)(PMe<sub>3</sub>)<sub>2</sub>H]·(CF<sub>3</sub>COOH)<sub>2</sub> (D) E = -1877.49936439

|   |              |              |              |    |              |              |              |
|---|--------------|--------------|--------------|----|--------------|--------------|--------------|
| 1 | 0.638687000  | 3.054181000  | 1.219670000  | 6  | 4.440268000  | 0.267223000  | -0.760122000 |
| 1 | -0.438474000 | 3.769277000  | 0.006737000  | 6  | 4.431984000  | 0.504041000  | 0.658864000  |
| 6 | -3.208411000 | 2.997002000  | 1.282217000  | 6  | 3.536231000  | 1.599230000  | 0.915224000  |
| 1 | -3.190275000 | 3.873694000  | 1.940065000  | 6  | 2.993731000  | 2.036661000  | -0.333640000 |
| 1 | -3.400142000 | 3.326022000  | 0.257469000  | 6  | 3.549403000  | 1.218909000  | -1.367215000 |
| 1 | -4.020053000 | 2.329868000  | 1.588788000  | 6  | 2.304605000  | -0.319298000 | 0.056141000  |
| 6 | -0.391338000 | -3.427040000 | 1.084285000  | 15 | 1.261669000  | -1.442508000 | -1.897848000 |
| 1 | -0.574091000 | -4.276176000 | 1.753202000  | 15 | 1.209164000  | -0.75729000  | 2.248408000  |
| 1 | -0.460176000 | -3.771626000 | 0.048181000  | 1  | 0.555308000  | 0.009161000  | -0.032807000 |
| 1 | 0.622101000  | -3.048231000 | 1.251578000  | 1  | 2.769579000  | -2.167419000 | 0.374332000  |
| 6 | -3.224665000 | -2.969469000 | 1.315766000  | 8  | 3.117364000  | -3.282470000 | 0.566459000  |
| 1 | -3.210805000 | -3.839064000 | 1.983103000  | 6  | -0.502590000 | -2.241890000 | 3.238679000  |
| 1 | -4.032285000 | -2.294524000 | 1.615861000  | 1  | -0.016286000 | -2.733066000 | -1.507383000 |
| 1 | -3.419253000 | -3.308469000 | 0.294821000  | 1  | -0.887504000 | -1.808085000 | 1.550548000  |
| 1 | -1.523694000 | -2.835515000 | 3.731125000  | 6  | -0.084224000 | -2.090619000 | 2.237016000  |
| 1 | -0.442863000 | -1.440755000 | 3.458617000  | 6  | 2.129948000  | 3.253583000  | -0.541318000 |
| 8 | 2.972419000  | 0.004478000  | 1.206714000  | 1  | 1.483816000  | 3.448943000  | 0.318891000  |
| 6 | 4.400841000  | 0.006806000  | 1.158145000  | 1  | 2.749884000  | 4.148814000  | -0.696621000 |
| 6 | 5.938244000  | -0.002373000 | -0.118967000 | 6  | 1.481214000  | 3.151446000  | -1.416218000 |
| 9 | 6.440034000  | 1.134553000  | 0.500335000  | 1  | 3.395135000  | 2.332130000  | 2.242280000  |
| 9 | 6.416146000  | -0.025986000 | -1.410811000 | 1  | 3.505477000  | 1.665717000  | 3.085723000  |
| 9 | 6.453148000  | -1.106829000 | 0.546157000  | 1  | 4.172066000  | 3.104306000  | 2.314702000  |
| 8 | 3.746420000  | -0.027449000 | -1.118681000 | 1  | 2.427942000  | 2.307253000  | 2.307253000  |

13. [Cp\*MoH(PMe<sub>3</sub>)<sub>2</sub>(CO)]·CF<sub>3</sub>COOH (B)·E = -1350.79060546

|   |              |              |             |   |             |              |             |
|---|--------------|--------------|-------------|---|-------------|--------------|-------------|
| 6 | -2.953386000 | -0.743377000 | 1.203919000 | 1 | 5.602536000 | -1.156753000 | 1.408266000 |
| 6 | -2.960558000 | 0.694708000  | 1.222085000 | 1 | 6.345902000 | 1.429984000  | 1.655341000 |
|   |              |              |             | 1 | 4.992684000 | -0.084205000 | 2.668249000 |

Electronic Supplementary Information for Dalton Transactions  
This journal is © The Royal Society of Chemistry 2010

|     |                                                                                                              |              |              |     |                                                                                                           |              |              |
|-----|--------------------------------------------------------------------------------------------------------------|--------------|--------------|-----|-----------------------------------------------------------------------------------------------------------|--------------|--------------|
| 6   | 5.407858000                                                                                                  | -0.632209000 | -1.485742000 | 1   | 4.567318000                                                                                               | -0.516917000 | 3.112306000  |
| 1   | 5.025561000                                                                                                  | -0.937276000 | -2.463826000 | 6   | 2.779995000                                                                                               | 1.903556000  | -2.975764000 |
| 1   | 6.366421000                                                                                                  | -0.119379000 | -1.654356000 | 1   | 3.457005000                                                                                               | 2.567378000  | -3.525952000 |
| 1   | 5.618443000                                                                                                  | -1.543246000 | -0.917542000 | 1   | 2.506426000                                                                                               | 1.064435000  | -3.621920000 |
| 6   | 3.429254000                                                                                                  | 1.492548000  | -2.844218000 | 1   | 1.867587000                                                                                               | 2.451365000  | -2.719454000 |
| 1   | 2.473828000                                                                                                  | 1.962714000  | -3.096584000 | 6   | 5.185890000                                                                                               | 0.616527000  | -2.052374000 |
| 1   | 4.223407000                                                                                                  | 2.180294000  | -3.169346000 | 1   | 5.707243000                                                                                               | 1.367545000  | -2.657349000 |
| 1   | 3.528236000                                                                                                  | 0.584376000  | -3.446284000 | 1   | 5.816443000                                                                                               | 0.331798000  | -1.204479000 |
| 1   | -0.852126000                                                                                                 | -2.263305000 | -0.981455000 | 1   | 5.007802000                                                                                               | -0.271013000 | -2.664898000 |
| 1   | 0.359827000                                                                                                  | -3.026250000 | 1.885661000  | 1   | 4.713721000                                                                                               | 3.474676000  | -1.424586000 |
| 6   | 2.295032000                                                                                                  | -1.343882000 | 3.642502000  | 1   | 3.289006000                                                                                               | 3.474918000  | -0.346835000 |
| 1   | 1.698522000                                                                                                  | -1.578734000 | 4.531412000  | 1   | -1.012501000                                                                                              | 2.813053000  | 0.161997000  |
| 1   | 2.840098000                                                                                                  | -2.238993000 | 3.327588000  | 8   | -1.955152000                                                                                              | 2.182003000  | 0.270238000  |
| 1   | 3.023395000                                                                                                  | -0.569759000 | 3.902105000  | 8   | -2.685814000                                                                                              | 1.419670000  | -0.970607000 |
| 6   | 0.264577000                                                                                                  | 0.604476000  | 3.100855000  | 6   | -4.268223000                                                                                              | 3.005107000  | -0.069185000 |
| 1   | -0.197898000                                                                                                 | 0.233533000  | 4.021966000  | 9   | -4.573037000                                                                                              | 3.047055000  | 1.277951000  |
| 1   | 0.933344000                                                                                                  | 1.432519000  | 3.349204000  | 9   | -5.219561000                                                                                              | 2.226990000  | -0.705740000 |
| 1   | -0.519036000                                                                                                 | 0.984186000  | 2.438741000  | 9   | -4.366883000                                                                                              | 4.292341000  | -0.573275000 |
| 6   | 2.383007000                                                                                                  | -2.414207000 | -3.023635000 | 6   | -2.860195000                                                                                              | 2.435217000  | -0.308185000 |
| 1   | 1.799896000                                                                                                  | -2.951337000 | -3.780318000 | 1   | -3.871786000                                                                                              | 0.156492000  | -1.218020000 |
| 1   | 3.086771000                                                                                                  | -1.747583000 | -3.531391000 | 8   | -4.311832000                                                                                              | -0.732072000 | -1.259680000 |
| 1   | 2.954705000                                                                                                  | -3.135032000 | -2.431271000 | 8   | -4.524480000                                                                                              | -0.480670000 | 1.002762000  |
| 6   | 0.308676000                                                                                                  | -0.432683000 | -3.141297000 | 6   | -4.631300000                                                                                              | -1.114202000 | -0.025195000 |
| 1   | -0.074441000                                                                                                 | -1.074890000 | -3.943027000 | 6   | -5.128980000                                                                                              | -2.566431000 | -0.037413000 |
| 1   | -0.538306000                                                                                                 | 0.044747000  | -2.640842000 | 9   | -5.720314000                                                                                              | -2.900151000 | 1.159654000  |
| 1   | 0.943082000                                                                                                  | 0.341178000  | -3.580561000 | 9   | -4.052346000                                                                                              | -3.429928000 | -0.237140000 |
| 1   | -0.388588000                                                                                                 | -3.201035000 | -2.426161000 | 9   | -6.044066000                                                                                              | -2.798161000 | -1.050072000 |
| 1   | 0.420254000                                                                                                  | -3.501695000 | -0.863082000 |     |                                                                                                           |              |              |
| 1   | -0.221042000                                                                                                 | 1.028744000  | -0.100472000 | 16. | [Cp*MoH (PMe <sub>3</sub> ) <sub>2</sub> (CO)] · (CF <sub>3</sub> COOH) <sub>2</sub> (E) E=-1877.50097522 |              |              |
| 8   | -0.901183000                                                                                                 | 1.824966000  | -0.096040000 |     |                                                                                                           |              |              |
| 8   | -2.475325000                                                                                                 | 0.342462000  | -0.804298000 | 6   | -0.987958000                                                                                              | 2.464932000  | 0.116314000  |
| 6   | -2.108760000                                                                                                 | 1.452479000  | -0.435589000 | 6   | -1.065519000                                                                                              | 2.039928000  | -1.253815000 |
| 6   | -3.096322000                                                                                                 | 2.626693000  | -0.310245000 | 6   | 0.254999000                                                                                               | 2.130008000  | -1.815565000 |
| 9   | -2.607398000                                                                                                 | 3.759215000  | -0.940611000 | 6   | 1.146764000                                                                                               | 2.602061000  | -0.801580000 |
| 9   | -4.309747000                                                                                                 | 2.308706000  | -0.890712000 | 6   | 0.380683000                                                                                               | 2.813048000  | 0.388084000  |
| 9   | -3.316723000                                                                                                 | 2.939050000  | 1.019714000  | 42  | 0.206676000                                                                                               | 0.421327000  | -0.071283000 |
| 1   | -4.109775000                                                                                                 | -0.260180000 | -0.926562000 | 15  | 0.717755000                                                                                               | -0.151621000 | 2.290786000  |
| 8   | -5.001030000                                                                                                 | -0.693763000 | -0.957709000 | 15  | 0.537173000                                                                                               | -1.391463000 | -1.738214000 |
| 8   | -5.192384000                                                                                                 | 0.044633000  | 1.196802000  | 1   | 1.765104000                                                                                               | -0.395788000 | 0.104438000  |
| 6   | -5.615044000                                                                                                 | -0.520953000 | 0.211663000  | 6   | -1.241116000                                                                                              | -0.374393000 | 0.347393000  |
| 6   | -7.006220000                                                                                                 | -1.168828000 | 0.166794000  | 8   | -2.171618000                                                                                              | -1.450339000 | 0.608406000  |
| 9   | -7.671477000                                                                                                 | -0.996106000 | 1.359138000  | 1   | 0.898861000                                                                                               | -3.830307000 | -1.801026000 |
| 9   | -6.905944000                                                                                                 | -2.532773000 | -0.075590000 | 6   | 0.980734000                                                                                               | -1.959937000 | 2.614164000  |
| 9   | -7.781201000                                                                                                 | -0.617308000 | -0.842889000 | 1   | 1.738633000                                                                                               | -3.065109000 | -0.423958000 |
|     |                                                                                                              |              |              | 6   | 0.815874000                                                                                               | -3.075168000 | -1.011022000 |
|     |                                                                                                              |              |              | 6   | 2.592435000                                                                                               | -2.979118000 | -0.999920000 |
|     |                                                                                                              |              |              | 1   | 3.079762000                                                                                               | 2.354301000  | -1.754201000 |
|     |                                                                                                              |              |              | 1   | 2.681285000                                                                                               | 4.023523000  | -1.333085000 |
|     |                                                                                                              |              |              | 1   | 3.171708000                                                                                               | 2.881167000  | -0.077034000 |
|     |                                                                                                              |              |              | 6   | 0.586566000                                                                                               | 2.022036000  | -3.280768000 |
|     |                                                                                                              |              |              | 1   | -0.028314000                                                                                              | 1.275369000  | -3.791841000 |
|     |                                                                                                              |              |              | 1   | 0.400901000                                                                                               | 3.780386000  | -3.780364000 |
|     |                                                                                                              |              |              | 1   | 1.638181000                                                                                               | 1.771120000  | -3.447117000 |
|     |                                                                                                              |              |              | 6   | -2.340630000                                                                                              | 1.801071000  | -2.021416000 |
|     |                                                                                                              |              |              | 1   | -3.133611000                                                                                              | 1.414259000  | -1.375964000 |
|     |                                                                                                              |              |              | 1   | -2.707086000                                                                                              | 2.739124000  | -2.463941000 |
|     |                                                                                                              |              |              | 1   | -2.200038000                                                                                              | 1.089227000  | -2.840237000 |
|     |                                                                                                              |              |              | 6   | 2.168561000                                                                                               | 2.745520000  | 1.010932000  |
|     |                                                                                                              |              |              | 1   | -1.908976000                                                                                              | 2.663150000  | 2.070778000  |
|     |                                                                                                              |              |              | 1   | -2.542827000                                                                                              | 3.768190000  | 0.846631000  |
|     |                                                                                                              |              |              | 1   | -2.997469000                                                                                              | 2.059298000  | 0.818104000  |
|     |                                                                                                              |              |              | 6   | 0.868457000                                                                                               | 3.537058000  | 1.615444000  |
|     |                                                                                                              |              |              | 1   | 1.937348000                                                                                               | 3.380669000  | 1.787498000  |
|     |                                                                                                              |              |              | 1   | 0.713713000                                                                                               | 4.619740000  | 1.501482000  |
|     |                                                                                                              |              |              | 1   | 0.329224000                                                                                               | 3.232527000  | 2.517045000  |
|     |                                                                                                              |              |              | 1   | 1.842726000                                                                                               | -2.303737000 | 2.038786000  |
|     |                                                                                                              |              |              | 1   | -0.018947000                                                                                              | -3.333303000 | -0.353310000 |
|     |                                                                                                              |              |              | 6   | -0.865155000                                                                                              | -1.742198000 | -2.911012000 |
|     |                                                                                                              |              |              | 1   | -0.633414000                                                                                              | -2.599633000 | -3.553186000 |
|     |                                                                                                              |              |              | 1   | -1.770251000                                                                                              | -1.960137000 | -2.335419000 |
|     |                                                                                                              |              |              | 1   | -1.061222000                                                                                              | -0.871058000 | -3.543529000 |
|     |                                                                                                              |              |              | 6   | 1.974933000                                                                                               | -1.302460000 | -2.920169000 |
|     |                                                                                                              |              |              | 1   | 2.045821000                                                                                               | -2.225267000 | -3.507219000 |
|     |                                                                                                              |              |              | 1   | 1.857909000                                                                                               | -0.458101000 | -3.604169000 |
|     |                                                                                                              |              |              | 1   | 2.903263000                                                                                               | -1.167048000 | -2.358067000 |
|     |                                                                                                              |              |              | 6   | -0.579270000                                                                                              | 0.242107000  | 3.566577000  |
|     |                                                                                                              |              |              | 1   | -0.277552000                                                                                              | -0.123613000 | 4.554816000  |
|     |                                                                                                              |              |              | 1   | -0.743080000                                                                                              | 1.322415000  | 3.624687000  |
|     |                                                                                                              |              |              | 6   | -1.522003000                                                                                              | -0.233910000 | 3.279705000  |
|     |                                                                                                              |              |              | 6   | 2.237370000                                                                                               | 0.552415000  | 3.109074000  |
|     |                                                                                                              |              |              | 1   | 2.370414000                                                                                               | 0.114385000  | 4.104937000  |
|     |                                                                                                              |              |              | 1   | 3.120677000                                                                                               | 0.333320000  | 2.502781000  |
|     |                                                                                                              |              |              | 1   | 2.150171000                                                                                               | 1.636942000  | 3.211188000  |
|     |                                                                                                              |              |              | 1   | 1.159721000                                                                                               | -2.146790000 | 3.680288000  |
|     |                                                                                                              |              |              | 1   | 0.096482000                                                                                               | -2.521071000 | 2.298134000  |
|     |                                                                                                              |              |              | 1   | 3.130821000                                                                                               | -0.151059000 | 0.002986000  |
|     |                                                                                                              |              |              | 8   | 4.138917000                                                                                               | -0.025444000 | -0.053910000 |
|     |                                                                                                              |              |              | 8   | 4.289841000                                                                                               | -2.249506000 | 0.464447000  |
|     |                                                                                                              |              |              | 6   | 4.770158000                                                                                               | -1.166665000 | 0.200178000  |
|     |                                                                                                              |              |              | 6   | 6.289867000                                                                                               | -0.944937000 | 0.120115000  |
|     |                                                                                                              |              |              | 9   | 6.700295000                                                                                               | -0.009560000 | 1.061228000  |
| 15. | [Cp*MoH (PMe <sub>3</sub> ) <sub>2</sub> (CO)] · (CF <sub>3</sub> COOH) <sub>2</sub> (C) · E =-1877.50320187 |              |              |     |                                                                                                           |              |              |
| 6   | 0.818856000                                                                                                  | -1.418456000 | -1.385800000 |     |                                                                                                           |              |              |
| 6   | 0.451079000                                                                                                  | -1.735270000 | -0.034949000 | 1   | 3.171708000                                                                                               | 2.881167000  | -0.077034000 |
| 6   | 1.552398000                                                                                                  | -2.437146000 | 0.565931000  | 6   | 0.586566000                                                                                               | 2.022036000  | -3.280768000 |
| 6   | 2.601230000                                                                                                  | -2.543290000 | -0.400368000 | 1   | -0.028314000                                                                                              | 1.275369000  | -3.791841000 |
| 6   | 2.143981000                                                                                                  | -1.925115000 | -1.607251000 | 1   | 0.400901000                                                                                               | 3.780386000  | -3.780364000 |
| 42  | 2.218068000                                                                                                  | -0.131594000 | 0.069301000  | 1   | 1.638181000                                                                                               | 1.771120000  | -3.447117000 |
| 15  | 3.572177000                                                                                                  | 1.283911000  | -1.405824000 | 6   | -2.340630000                                                                                              | 1.801071000  | -2.021416000 |
| 15  | 2.402162000                                                                                                  | 0.414139000  | 2.457840000  | 1   | -3.133611000                                                                                              | 1.414259000  | -1.375964000 |
| 1   | 3.843840000                                                                                                  | 0.176472000  | 0.634129000  | 1   | -2.707086000                                                                                              | 2.739124000  | -2.463941000 |
| 1   | 1.174461000                                                                                                  | 1.444125000  | 0.105209000  | 1   | -2.200038000                                                                                              | 1.089227000  | -2.840237000 |
| 8   | 0.496516000                                                                                                  | 2.448492000  | 0.112296000  | 6   | 2.168561000                                                                                               | 2.745520000  | 1.010932000  |
| 1   | 3.016925000                                                                                                  | 2.290097000  | 3.942109000  | 1   | -1.908976000                                                                                              | 2.663150000  | 2.070778000  |
| 6   | 4.152424000                                                                                                  | 2.893664000  | -0.683547000 | 1   | -2.542827000                                                                                              | 3.768190000  | 0.846631000  |
| 1   | 4.012167000                                                                                                  | 2.257981000  | 2.459999000  | 1   | -2.997469000                                                                                              | 2.059298000  | 0.818104000  |
| 6   | 3.002407000                                                                                                  | 2.126042000  | 2.858453000  | 6   | 0.868457000                                                                                               | 3.537058000  | 1.615444000  |
| 6   | 3.882709000                                                                                                  | -3.320350000 | -0.235799000 | 1   | 1.937348000                                                                                               | 3.380669000  | 1.787498000  |
| 1   | 4.225247000                                                                                                  | -3.321657000 | 0.803614000  | 1   | 0.713713000                                                                                               | 4.619740000  | 1.501482000  |
| 1   | 3.752233000                                                                                                  | -4.369551000 | -0.539184000 | 1   | 0.329224000                                                                                               | 3.232527000  | 2.517045000  |
| 1   | 4.691475000                                                                                                  | -2.903083000 | -0.843900000 | 1   | 1.842726000                                                                                               | -2.303737000 | 2.038786000  |
| 6   | 1.505141000                                                                                                  | -3.179549000 | 1.876210000  | 1   | -0.018947000                                                                                              | -3.333303000 | -0.353310000 |
| 1   | 0.902084000                                                                                                  | -2.663970000 | 2.629189000  | 6   | -0.865155000                                                                                              | -1.742198000 | -2.911012000 |
| 1   | 1.052778000                                                                                                  | -4.171220000 | 1.731029000  | 1   | -0.633414000                                                                                              | -2.599633000 | -3.553186000 |
| 1   | 2.504083000                                                                                                  | -3.341523000 | 2.292315000  | 1   | -1.770251000                                                                                              | -1.960137000 | -2.335419000 |
| 6   | -0.926597000                                                                                                 | -1.581019000 | 0.556508000  | 1   | -1.061222000                                                                                              | -0.871058000 | -3.543529000 |
| 1   | -1.426978000                                                                                                 | -0.686764000 | 0.175447000  | 6   | 1.974933000                                                                                               | -1.302460000 | -2.920169000 |
| 1   | -1.560750000                                                                                                 | -2.445072000 | 0.310539000  | 1   | 2.045821000                                                                                               | -2.225267000 | -3.507219000 |
| 1   | -0.896437000                                                                                                 | -1.499889000 | 1.647075000  | 1   | 1.857909000                                                                                               | -0.458101000 | -3.604169000 |
| 6   | -0.106557000                                                                                                 | -0.874654000 | -2.444172000 | 1   | 2.903263000                                                                                               | -1.167048000 | -2.358067000 |
| 1   | 0.443304000                                                                                                  | -0.360197000 | -3.238459000 | 6   | -0.579270000                                                                                              | 0.242107000  | 3.566577000  |
| 1   | -0.679059000                                                                                                 | -1.686938000 | -2.916025000 | 1   | -0.277552000                                                                                              | -0.123613000 | 4.554816000  |
| 1   | -0.827017000                                                                                                 | -0.164598000 | -2.029180000 | 1   | -0.743080000                                                                                              | 1.322415000  | 3.624687000  |
| 6   | 2.819114000                                                                                                  | -2.041787000 | -2.949361000 | 6   | -1.522003000                                                                                              | -0.233910000 | 3.279705000  |
| 1   | 3.902120000                                                                                                  | -2.164351000 | -2.854441000 | 6   | 2.237370000                                                                                               | 0.552415000  | 3.109074000  |
| 1   | 2.441496000                                                                                                  | -2.925331000 |              |     |                                                                                                           |              |              |

Electronic Supplementary Information for Dalton Transactions  
This journal is © The Royal Society of Chemistry 2010

|   |              |              |              |   |              |              |              |
|---|--------------|--------------|--------------|---|--------------|--------------|--------------|
| 9 | 6.976845000  | -2.113805000 | 0.352585000  | 1 | 3.673232000  | -0.818196000 | -0.549128000 |
| 9 | 6.656121000  | -0.471903000 | -1.132792000 | 1 | 3.260597000  | -2.359176000 | -1.305189000 |
| 1 | -3.829192000 | -1.502741000 | 0.533401000  | 1 | 2.830055000  | -0.841536000 | -2.097449000 |
| 8 | -4.808792000 | -1.693184000 | 0.499620000  | 6 | 2.492141000  | -1.632878000 | 2.016927000  |
| 8 | -5.092023000 | 0.549909000  | 0.156232000  | 1 | 2.246935000  | -1.235278000 | 3.004687000  |
| 6 | -5.503773000 | -0.585200000 | 0.279374000  | 1 | 2.671228000  | -2.709374000 | 2.145700000  |
| 6 | -6.997481000 | -0.923015000 | 0.150551000  | 1 | 3.437566000  | -1.192109000 | 1.690870000  |
| 9 | -7.767417000 | 0.219219000  | 0.166075000  | 6 | -0.624385000 | -1.895103000 | 2.619870000  |
| 9 | -7.431046000 | -1.745237000 | 1.178234000  | 1 | -1.690315000 | -1.652098000 | 2.648827000  |
| 9 | -7.235902000 | -1.583550000 | -1.049317000 | 1 | -0.529734000 | -2.962713000 | 2.840826000  |
|   |              |              |              | 1 | -0.138814000 | -1.350944000 | 3.434296000  |
|   |              |              |              | 6 | -2.144517000 | -1.985895000 | -0.196345000 |
|   |              |              |              | 1 | -2.555710000 | -1.518351000 | -1.095060000 |
|   |              |              |              | 1 | -2.261344000 | -3.072458000 | -0.309958000 |
|   |              |              |              | 1 | -2.766115000 | -1.680646000 | 0.650267000  |
|   |              |              |              | 6 | 0.063659000  | -1.802216000 | -2.477231000 |
|   |              |              |              | 1 | 0.824161000  | -1.353674000 | -3.121191000 |
|   |              |              |              | 1 | 0.117463000  | -2.888599000 | -2.633803000 |
|   |              |              |              | 1 | -0.920725000 | -1.483648000 | -2.828409000 |
|   |              |              |              | 1 | 0.247706000  | 4.062417000  | -1.224422000 |
|   |              |              |              | 1 | -0.126815000 | 3.833010000  | 2.177693000  |
|   |              |              |              | 6 | 1.406814000  | 1.455620000  | 3.826091000  |
|   |              |              |              | 1 | 1.548716000  | 2.129666000  | 4.498696000  |
|   |              |              |              | 1 | -0.066533000 | 1.554176000  | 4.015723000  |
|   |              |              |              | 1 | 1.304893000  | 0.427942000  | 4.048356000  |
|   |              |              |              | 6 | 3.213411000  | 1.935862000  | 2.004900000  |
|   |              |              |              | 1 | 3.596268000  | 2.585955000  | 2.799095000  |
|   |              |              |              | 1 | 3.631259000  | 0.936062000  | 2.139018000  |
|   |              |              |              | 1 | 3.540246000  | 2.323633000  | 1.035625000  |
|   |              |              |              | 6 | -2.081265000 | 1.343376000  | -2.602381000 |
|   |              |              |              | 1 | -2.262833000 | 1.974742000  | -3.479109000 |
|   |              |              |              | 1 | -2.086316000 | 0.297565000  | -2.918377000 |
|   |              |              |              | 1 | -2.892412000 | 1.493857000  | -1.883421000 |
|   |              |              |              | 6 | 0.723477000  | 1.760731000  | -3.228875000 |
|   |              |              |              | 1 | 0.360213000  | 2.401026000  | -4.040051000 |
|   |              |              |              | 1 | 1.698613000  | 2.126089000  | -2.893295000 |
|   |              |              |              | 1 | 0.844106000  | 0.745704000  | -3.613450000 |
|   |              |              |              | 1 | -0.991463000 | 4.089580000  | -2.505284000 |
|   |              |              |              | 1 | -1.459385000 | 3.801508000  | -0.808887000 |
|   |              |              |              | 1 | -3.026488000 | 1.511765000  | 1.778854000  |

### c. Ionic species

17.  $[\text{Cp}^*\text{Mo}(\eta^2\text{-H}_2)(\text{CO})(\text{PMe}_3)_2]^+ \text{E} = -824.482747257$

|    |              |              |              |    |              |              |              |
|----|--------------|--------------|--------------|----|--------------|--------------|--------------|
| 6  | 0.719710000  | 1.787633000  | 1.060998000  | 1  | 0.824161000  | -1.353674000 | -3.121191000 |
| 6  | -0.719637000 | 1.787628000  | 1.061068000  | 1  | 0.117463000  | -2.888599000 | -2.633803000 |
| 6  | -1.157152000 | 2.030936000  | -0.291950000 | 1  | -0.920725000 | -1.483648000 | -2.828409000 |
| 6  | -0.000068000 | 2.167580000  | -1.121964000 | 1  | 0.247706000  | 4.062417000  | -1.224422000 |
| 6  | 1.157101000  | 2.030924000  | -0.292070000 | 1  | -0.126815000 | 3.833010000  | 2.177693000  |
| 42 | 0.000004000  | -0.085843000 | -0.131571000 | 6  | 1.406814000  | 1.455620000  | 3.826091000  |
| 15 | 2.290017000  | -1.251900000 | -0.320945000 | 1  | 1.548716000  | 2.129666000  | 4.498696000  |
| 15 | -2.290016000 | -1.251852000 | -0.321161000 | 1  | -0.066533000 | 1.554176000  | 4.015723000  |
| 1  | 0.000068000  | -0.734413000 | -1.885399000 | 1  | 1.304893000  | 0.427942000  | 4.048356000  |
| 6  | -0.000073000 | -1.229613000 | 1.462146000  | 6  | 3.213411000  | 1.935862000  | 2.004900000  |
| 8  | -0.000116000 | -1.807433000 | 2.477401000  | 1  | 3.596268000  | 2.585955000  | 2.799095000  |
| 1  | -3.149226000 | -3.556312000 | -0.374264000 | 1  | 3.631259000  | 0.936062000  | 2.139018000  |
| 6  | 2.157005000  | -3.102401000 | -0.278176000 | 1  | 3.540246000  | 2.323633000  | 1.035625000  |
| 1  | -1.528136000 | -3.455897000 | -1.101389000 | 6  | -2.081265000 | 1.343376000  | -2.602381000 |
| 6  | -2.157020000 | -3.102356000 | -0.278458000 | 1  | -2.262833000 | 1.974742000  | -3.479109000 |
| 6  | -0.000136000 | 2.571503000  | -2.573036000 | 1  | -2.086316000 | 0.297565000  | -2.918377000 |
| 1  | -0.883453000 | 2.202867000  | -3.102094000 | 1  | -2.892412000 | 1.493857000  | -1.883421000 |
| 1  | -0.000139000 | 3.666498000  | -2.664049000 | 6  | 0.723477000  | 1.760731000  | -3.228875000 |
| 1  | 0.883137000  | 2.202867000  | -3.102170000 | 1  | 0.360213000  | 2.401026000  | -4.040051000 |
| 6  | -2.557766000 | 2.383310000  | -0.716924000 | 1  | 1.698613000  | 2.126089000  | -2.893295000 |
| 1  | -3.322011000 | 1.876907000  | -0.122778000 | 1  | 0.844106000  | 0.745704000  | -3.613450000 |
| 1  | -2.718285000 | 3.462403000  | -0.586143000 | 1  | -0.991463000 | 4.089580000  | -2.505284000 |
| 1  | -2.737347000 | 2.159817000  | -1.771876000 | 1  | -1.459385000 | 3.801508000  | -0.808887000 |
| 6  | -1.575462000 | 1.846206000  | 2.299948000  | 1  | -3.026488000 | 1.511765000  | 1.778854000  |
| 1  | -1.192422000 | 1.199569000  | 3.094625000  |    |              |              |              |
| 1  | -1.595628000 | 2.871473000  | 2.694235000  |    |              |              |              |
| 1  | -2.609660000 | 1.555533000  | 2.103884000  |    |              |              |              |
| 6  | 1.575636000  | 1.846269000  | 2.299810000  | 8  | -1.541832000 | -1.151303000 | -0.000046000 |
| 1  | 2.609865000  | 1.555788000  | 2.103633000  | 8  | -1.599350000 | -1.147666000 | -0.000037000 |
| 1  | 1.595665000  | 2.871513000  | 2.694159000  | 6  | -1.070513000 | 0.011703000  | 0.000058000  |
| 1  | 1.192778000  | 1.199516000  | 3.094482000  | 6  | 0.502236000  | 0.011782000  | -0.000013000 |
| 6  | 2.557661000  | 2.383329000  | -0.717202000 | 9  | 1.038542000  | -0.645840000 | -1.118743000 |
| 1  | 2.737220000  | 2.159591000  | -1.772107000 | 9  | 1.038451000  | -0.645385000 | -1.119042000 |
| 1  | 2.718081000  | 3.462470000  | -0.586696000 | 9  | 1.094019000  | 1.278801000  | -0.000255000 |
| 1  | 3.321981000  | 1.877152000  | -0.122962000 |    |              |              |              |
| 1  | 1.528103000  | -3.455974000 | -1.101079000 |    |              |              |              |
| 1  | -1.708556000 | -3.426268000 | 0.664906000  |    |              |              |              |
| 6  | -3.557351000 | -0.958587000 | 0.998183000  |    |              |              |              |
| 1  | -4.408434000 | -1.631373000 | 0.848015000  |    |              |              |              |
| 1  | -3.122292000 | -1.152445000 | 1.982956000  |    |              |              |              |
| 1  | -3.921854000 | 0.070814000  | 0.973027000  | 6  | -2.695962000 | -1.180167000 | 0.997502000  |
| 6  | -3.254425000 | -1.003863000 | -1.888062000 | 6  | -2.936995000 | 0.233742000  | 1.115941000  |
| 1  | -4.158435000 | -1.622661000 | -1.880165000 | 6  | -1.900393000 | 0.783669000  | 1.950792000  |
| 1  | -3.545971000 | 0.042403000  | -2.003997000 | 6  | -1.024804000 | -0.278404000 | 2.343404000  |
| 1  | -2.640539000 | -1.289779000 | -2.748253000 | 6  | -1.519249000 | -1.490484000 | -1.770101000 |
| 6  | 3.557292000  | -0.958616000 | 0.998453000  | 42 | -0.966275000 | -0.054872000 | -0.104860000 |
| 1  | 4.408290000  | -1.631545000 | 0.848443000  | 15 | 0.184518000  | -2.014664000 | -1.259108000 |
| 1  | 3.921943000  | 0.070728000  | 0.973166000  | 15 | -0.607435000 | -2.342401000 | -0.950774000 |
| 1  | 3.122133000  | -1.152266000 | 1.983222000  | 1  | 0.884026000  | 0.198966000  | -0.552572000 |
| 6  | 3.254513000  | -1.003963000 | -1.887802000 | 1  | -1.833619000 | -0.071017000 | -1.844814000 |
| 1  | 4.158550000  | -1.622721000 | -1.879822000 | 8  | -2.450127000 | -0.101060000 | -2.846242000 |
| 1  | 2.640691000  | -1.289946000 | -2.748016000 | 1  | 0.601217000  | 3.412326000  | -2.799513000 |
| 1  | 3.546016000  | 0.042311000  | -2.003768000 | 6  | 0.992729000  | -1.568670000 | -2.863281000 |
| 1  | 3.149208000  | -3.556364000 | -0.373980000 | 1  | 1.399291000  | 1.906156000  | -2.248544000 |
| 1  | 1.708555000  | -3.426273000 | 0.665208000  | 6  | 0.436265000  | 2.377893000  | -2.476942000 |
| 1  | 0.000082000  | -1.441482000 | -1.431772000 | 6  | 0.140745000  | -0.144883000 | 3.288813000  |
|    |              |              |              | 1  | 0.720252000  | 0.763289000  | 3.099192000  |
|    |              |              |              | 1  | -0.207479000 | -0.111960000 | 4.331010000  |
|    |              |              |              | 1  | 0.833817000  | -0.833817000 | 3.199993000  |
|    |              |              |              | 6  | -1.881454000 | 2.165936000  | 2.546620000  |
|    |              |              |              | 1  | -2.343676000 | 2.909433000  | 1.891336000  |
|    |              |              |              | 1  | -2.446238000 | 2.172612000  | 3.490003000  |
|    |              |              |              | 1  | -0.864268000 | 2.495381000  | 2.774082000  |
|    |              |              |              | 6  | -4.197554000 | 0.937757000  | 0.685996000  |
|    |              |              |              | 1  | 4.581414000  | 0.545419000  | -0.260323000 |
|    |              |              |              | 1  | -4.986940000 | 0.810287000  | 1.440917000  |
|    |              |              |              | 1  | -4.040956000 | 2.011950000  | 0.558326000  |
|    |              |              |              | 6  | -3.671614000 | -2.175003000 | 0.422215000  |
|    |              |              |              | 1  | -3.181296000 | -3.101431000 | 0.112534000  |
|    |              |              |              | 1  | -4.434144000 | -2.441857000 | 1.168219000  |
|    |              |              |              | 1  | -4.193188000 | -1.771059000 | -0.450591000 |
|    |              |              |              | 6  | -1.047174000 | -2.873226000 | 2.135320000  |
|    |              |              |              | 1  | 0.021888000  | -2.896145000 | 2.362894000  |
|    |              |              |              | 1  | -1.576819000 | -3.221024000 | 3.033633000  |
|    |              |              |              | 1  | -1.242604000 | -3.605238000 | 1.347122000  |

18.  $[\text{Cp}^*\text{MoH}(\text{COH})(\text{PMe}_3)_2]^+ \text{E} = -824.450090537$

|    |              |              |              |   |              |              |              |
|----|--------------|--------------|--------------|---|--------------|--------------|--------------|
| 6  | -0.696100000 | -1.628153000 | 0.015321000  | 6 | -1.881454000 | 2.165936000  | 2.546620000  |
| 6  | -0.015817000 | -1.578288000 | 1.277923000  | 1 | -2.343676000 | 2.909433000  | 1.891336000  |
| 6  | 1.390688000  | -1.431097000 | 1.011140000  | 1 | -2.446238000 | 2.172612000  | 3.490003000  |
| 6  | 1.577519000  | -1.355298000 | -0.404341000 | 1 | -0.864268000 | 2.495381000  | 2.774082000  |
| 6  | 0.291625000  | -1.502961000 | -1.019597000 | 6 | -4.197554000 | 0.937757000  | 0.685996000  |
| 42 | 0.159482000  | 0.598387000  | 0.290430000  | 1 | 4.581414000  | 0.545419000  | -0.260323000 |
| 15 | -0.465592000 | 1.796613000  | -1.808099000 | 1 | -4.986940000 | 0.810287000  | 1.440917000  |
| 15 | 1.362404000  | 1.891299000  | 2.055416000  | 1 | -4.040956000 | 2.011950000  | 0.558326000  |
| 1  | 1.254739000  | 1.831003000  | -0.259236000 | 6 | -3.671614000 | -2.175003000 | 0.422215000  |
| 6  | -1.295789000 | 1.439813000  | 0.956601000  | 1 | -3.181296000 | -3.101431000 | 0.112534000  |
| 8  | -2.33068     |              |              |   |              |              |              |

Electronic Supplementary Information for Dalton Transactions  
This journal is © The Royal Society of Chemistry 2010

|   |              |              |               |    |              |              |              |
|---|--------------|--------------|---------------|----|--------------|--------------|--------------|
| 1 | 1.786352000  | -0.843458000 | -2.657285000  | 6  | 1.667816000  | 2.363081000  | 0.564301000  |
| 1 | -0.052784000 | 1.823199000  | -3.282964000  | 6  | 2.487066000  | 3.151977000  | -0.486800000 |
| 6 | -2.108884000 | 3.310450000  | -1.456103000  | 9  | 1.984186000  | 4.410879000  | -0.746732000 |
| 1 | -1.805167000 | 4.263703000  | -1.903020000  | 9  | 3.820081000  | 3.440811000  | -0.127131000 |
| 1 | -2.694256000 | 2.743596000  | -2.1866073000 | 9  | 2.471966000  | 2.448051000  | -1.707479000 |
| 1 | -2.739918000 | 3.516913000  | -0.586623000  | 1  | 3.580768000  | 0.823158000  | 0.676632000  |
| 6 | 0.307843000  | 3.530837000  | 0.133894000   | 8  | 4.522930000  | 0.415547000  | 0.477446000  |
| 1 | 0.536519000  | 4.444020000  | -0.427541000  | 8  | 3.552247000  | -1.653471000 | 0.576124000  |
| 1 | -0.285282000 | 3.794966000  | 1.012115000   | 6  | 4.496931000  | -0.893258000 | 0.426637000  |
| 1 | 1.239740000  | 3.051817000  | 0.457023000   | 6  | 5.889940000  | -1.446765000 | 0.076254000  |
| 6 | -0.888130000 | -3.448238000 | -1.753178000  | 9  | 5.964874000  | -2.806243000 | 0.308850000  |
| 1 | -0.302132000 | -4.171746000 | -2.330974000  | 9  | 6.899143000  | -0.839920000 | 0.805493000  |
| 1 | -1.291388000 | -3.951178000 | -0.870201000  | 9  | 6.160929000  | -1.237415000 | -1.273706000 |
| 1 | -1.722338000 | -3.092937000 | -2.365915000  |    |              |              |              |
| 6 | 1.590399000  | -2.841988000 | -0.380427000  |    |              |              |              |
| 1 | 1.998938000  | -3.648876000 | -0.999781000  |    |              |              |              |
| 1 | 2.380190000  | -2.110143000 | -0.192977000  |    |              |              |              |
| 1 | 1.262622000  | -3.257930000 | 0.574785000   |    |              |              |              |
| 1 | 1.428823000  | -2.460633000 | -3.327513000  |    |              |              |              |
| 1 | 0.261408000  | -1.126807000 | -3.545709000  |    |              |              |              |
| 1 | 0.815357000  | 0.480738000  | 0.211947000   |    |              |              |              |
| 8 | 2.707715000  | 1.453103000  | 0.911839000   | 6  | 2.974746000  | 0.114749000  | 1.115503000  |
| 8 | 2.957127000  | 0.493479000  | -1.153151000  | 6  | 2.635276000  | -1.278267000 | 1.009217000  |
| 6 | 3.309276000  | 0.777949000  | 0.043723000   | 6  | 1.428954000  | -1.491334000 | 1.769632000  |
| 6 | 4.616226000  | 0.089538000  | 0.522945000   | 6  | 1.031195000  | -0.244534000 | 2.346481000  |
| 9 | 5.283804000  | 0.794936000  | 1.513919000   | 6  | 1.984975000  | 0.743521000  | 1.952827000  |
| 9 | 4.297937000  | -1.174243000 | 1.075620000   | 42 | 0.996763000  | -0.055367000 | -0.127208000 |
| 9 | 5.519207000  | -0.146996000 | -0.469466000  | 15 | 0.699982000  | 2.346751000  | -0.889917000 |
|   |              |              |               | 15 | -0.187727000 | -1.953778000 | -1.341121000 |
|   |              |              |               | 1  | -0.723915000 | 0.438316000  | -0.569743000 |
|   |              |              |               | 6  | 1.910646000  | -0.081171000 | -1.829381000 |
|   |              |              |               | 8  | 2.555477000  | -0.116588000 | -2.817079000 |
|   |              |              |               | 1  | -1.558595000 | -2.208203000 | -3.373331000 |
|   |              |              |               | 6  | -0.238851000 | 2.500590000  | -2.480833000 |
|   |              |              |               | 1  | -1.831789000 | -0.633812000 | -2.583253000 |
|   |              |              |               | 6  | -1.071455000 | -1.368800000 | -2.864119000 |
|   |              |              |               | 6  | -0.124739000 | -0.051826000 | 3.291622000  |
|   |              |              |               | 1  | -1.028958000 | -0.554911000 | 2.938781000  |
|   |              |              |               | 1  | 0.121093000  | -0.443433000 | 4.289048000  |
|   |              |              |               | 1  | -0.380656000 | 1.004931000  | 3.405080000  |
|   |              |              |               | 6  | 0.836250000  | -2.824436000 | 2.142310000  |
|   |              |              |               | 1  | 1.021194000  | -3.594744000 | 1.383629000  |
|   |              |              |               | 1  | 1.286249000  | -3.185187000 | 3.078645000  |
|   |              |              |               | 1  | -0.242770000 | -2.756167000 | 2.306179000  |
|   |              |              |               | 6  | 3.539964000  | -2.348622000 | 0.454933000  |
|   |              |              |               | 1  | 4.063063000  | -2.014382000 | -0.446108000 |
|   |              |              |               | 1  | 4.303223000  | -2.628583000 | 1.195581000  |
|   |              |              |               | 1  | 2.989304000  | -3.258043000 | 0.199405000  |
|   |              |              |               | 6  | 4.281015000  | 0.725151000  | 0.677843000  |
|   |              |              |               | 1  | 4.199502000  | 1.805981000  | 0.534639000  |
|   |              |              |               | 1  | 5.060835000  | 0.554038000  | 1.434393000  |
|   |              |              |               | 1  | 4.635426000  | 0.293965000  | -0.263149000 |
|   |              |              |               | 6  | 2.093906000  | 2.126931000  | 2.537779000  |
|   |              |              |               | 1  | 1.125671000  | 2.507036000  | 2.873278000  |
|   |              |              |               | 1  | 2.755388000  | 2.107589000  | 3.415697000  |
|   |              |              |               | 1  | 2.518155000  | 2.849858000  | 1.835472000  |
|   |              |              |               | 1  | -1.254522000 | 2.125658000  | -2.320116000 |
|   |              |              |               | 1  | -0.360828000 | -0.893772000 | -3.546253000 |
|   |              |              |               | 6  | 0.858778000  | -3.325247000 | -2.026965000 |
|   |              |              |               | 1  | 0.247668000  | -4.00052000  | -2.636746000 |
|   |              |              |               | 1  | 1.659862000  | -2.908400000 | -2.644572000 |
|   |              |              |               | 1  | 1.309555000  | -3.901113000 | -1.213840000 |
|   |              |              |               | 6  | -1.546705000 | -2.886428000 | -0.488646000 |
|   |              |              |               | 1  | -2.061638000 | -3.535523000 | -1.205910000 |
|   |              |              |               | 1  | -1.140749000 | -3.503381000 | 0.316334000  |
|   |              |              |               | 1  | -2.259588000 | -2.177959000 | -0.056680000 |
|   |              |              |               | 6  | 2.228346000  | 3.334894000  | -1.262004000 |
|   |              |              |               | 1  | 1.953079000  | 4.308032000  | -1.684072000 |
|   |              |              |               | 1  | 2.814809000  | 3.501412000  | -0.353915000 |
|   |              |              |               | 1  | 2.847696000  | 2.792980000  | -1.983256000 |
|   |              |              |               | 6  | -0.296410000 | 3.478909000  | 0.186187000  |
|   |              |              |               | 1  | -0.380526000 | 4.467416000  | -0.280422000 |
|   |              |              |               | 1  | -1.297957000 | 3.046123000  | 0.288937000  |
|   |              |              |               | 1  | 0.158334000  | 3.587869000  | 1.173202000  |
|   |              |              |               | 1  | -0.294378000 | 3.550763000  | -2.789677000 |
|   |              |              |               | 1  | 0.246476000  | 1.917365000  | -3.268105000 |
|   |              |              |               | 1  | -1.089152000 | 0.212868000  | 0.162631000  |
|   |              |              |               | 8  | -2.463372000 | -0.020971000 | 0.971682000  |
|   |              |              |               | 8  | -3.152009000 | 1.705602000  | -0.350665000 |
|   |              |              |               | 6  | -3.320392000 | 0.692912000  | 0.350092000  |
|   |              |              |               | 6  | -4.756149000 | 0.120843000  | 0.451454000  |
|   |              |              |               | 9  | -5.093456000 | -0.257680000 | 1.745873000  |
|   |              |              |               | 9  | -5.732849000 | 0.997838000  | 0.016809000  |
|   |              |              |               | 9  | -4.859840000 | -1.031164000 | -0.344747000 |

**d. proton transfer transition states**

**22. [Cp\*MoH (PMe<sub>3</sub>)<sub>2</sub> (CO)] CF<sub>3</sub>COOH (B-TS) · E =**

-1350.77698017

|    |              |              |              |
|----|--------------|--------------|--------------|
| 6  | 2.974746000  | 0.114749000  | 1.115503000  |
| 6  | 2.635276000  | -1.278267000 | 1.009217000  |
| 6  | 1.428954000  | -1.491334000 | 1.769632000  |
| 6  | 1.031195000  | -0.244534000 | 2.346481000  |
| 6  | 1.984975000  | 0.743521000  | 1.952827000  |
| 42 | 0.996763000  | -0.055367000 | -0.127208000 |
| 15 | 0.699982000  | 2.346751000  | -0.889917000 |
| 15 | -0.187727000 | -1.953778000 | -1.341121000 |
| 1  | -0.723915000 | 0.438316000  | -0.569743000 |
| 6  | 1.910646000  | -0.081171000 | -1.829381000 |
| 8  | 2.555477000  | -0.116588000 | -2.817079000 |
| 1  | -1.558595000 | -2.208203000 | -3.373331000 |
| 6  | -0.238851000 | 2.500590000  | -2.480833000 |
| 1  | -1.831789000 | -0.633812000 | -2.583253000 |
| 6  | -1.071455000 | -1.368800000 | -2.864119000 |
| 6  | -0.124739000 | -0.051826000 | 3.291622000  |
| 1  | -1.028958000 | -0.554911000 | 2.938781000  |
| 1  | 0.121093000  | -0.443433000 | 4.289048000  |
| 1  | -0.380656000 | 1.004931000  | 3.405080000  |
| 6  | 0.836250000  | -2.824436000 | 2.142310000  |
| 1  | 1.021194000  | -3.594744000 | 1.383629000  |
| 1  | 1.286249000  | -3.185187000 | 3.078645000  |
| 1  | -0.242770000 | -2.756167000 | 2.306179000  |
| 6  | 3.539964000  | -2.348622000 | 0.454933000  |
| 1  | 4.063063000  | -2.014382000 | -0.446108000 |
| 1  | 4.303223000  | -2.628583000 | 1.195581000  |
| 1  | 2.989304000  | -3.258043000 | 0.199405000  |
| 6  | 4.281015000  | 0.725151000  | 0.677843000  |
| 1  | 4.199502000  | 1.805981000  | 0.534639000  |
| 1  | 5.060835000  | 0.554038000  | 1.434393000  |
| 1  | 4.635426000  | 0.293965000  | -0.263149000 |
| 6  | 2.093906000  | 2.126931000  | 2.537779000  |
| 1  | 1.125671000  | 2.507036000  | 2.873278000  |
| 1  | 2.755388000  | 2.107589000  | 3.415697000  |
| 1  | 2.518155000  | 2.849858000  | 1.835472000  |
| 1  | -1.254522000 | 2.125658000  | -2.320116000 |
| 1  | -0.360828000 | -0.893772000 | -3.546253000 |
| 6  | 0.858778000  | -3.325247000 | -2.026965000 |
| 1  | 0.247668000  | -4.00052000  | -2.636746000 |
| 1  | 1.659862000  | -2.908400000 | -2.644572000 |
| 1  | 1.309555000  | -3.901113000 | -1.213840000 |
| 6  | -1.546705000 | -2.886428000 | -0.488646000 |
| 1  | -2.061638000 | -3.535523000 | -1.205910000 |
| 1  | -1.140749000 | -3.503381000 | 0.316334000  |
| 1  | -2.259588000 | -2.177959000 | -0.056680000 |
| 6  | 2.228346000  | 3.334894000  | -1.262004000 |
| 1  | 1.953079000  | 4.308032000  | -1.684072000 |
| 1  | 2.814809000  | 3.501412000  | -0.353915000 |
| 1  | 2.847696000  | 2.792980000  | -1.983256000 |
| 6  | -0.296410000 | 3.478909000  | 0.186187000  |
| 1  | -0.380526000 | 4.467416000  | -0.280422000 |
| 1  | -1.297957000 | 3.046123000  | 0.288937000  |
| 1  | 0.158334000  | 3.587869000  | 1.173202000  |
| 1  | -0.294378000 | 3.550763000  | -2.789677000 |
| 1  | 0.246476000  | 1.917365000  | -3.268105000 |
| 1  | -1.089152000 | 0.212868000  | 0.162631000  |
| 8  | -2.463372000 | -0.020971000 | 0.971682000  |
| 8  | -3.152009000 | 1.705602000  | -0.350665000 |
| 6  | -3.320392000 | 0.692912000  | 0.350092000  |
| 6  | -4.756149000 | 0.120843000  | 0.451454000  |
| 9  | -5.093456000 | -0.257680000 | 1.745873000  |
| 9  | -5.732849000 | 0.997838000  | 0.016809000  |
| 9  | -4.859840000 | -1.031164000 | -0.344747000 |

**23. [Cp\*Mo (CO) (PMe<sub>3</sub>)<sub>2</sub>H] (CF<sub>3</sub>COOH)<sub>2</sub> (D-TS) E =**

-1877.49626837

|   |             |              |              |
|---|-------------|--------------|--------------|
| 6 | 4.195936000 | -0.201821000 | -0.621999000 |
| 6 | 4.131528000 | 0.344047000  | 0.707233000  |
| 6 | 3.386201000 | 1.574407000  | 0.639637000  |

**21. [Cp\*Mo(η<sup>2</sup>-H<sub>2</sub>)(CO)(PMe<sub>3</sub>)<sub>2</sub>](CF<sub>3</sub>COOH)<sub>2</sub>(D') E =**

-1877.50247403

|    |              |              |              |
|----|--------------|--------------|--------------|
| 6  | -4.114988000 | 0.007610000  | 0.300808000  |
| 6  | -3.899987000 | -0.325703000 | -1.082235000 |
| 6  | -3.162597000 | 0.758361000  | -1.683541000 |
| 6  | -2.912469000 | 1.744820000  | -0.681397000 |
| 6  | -3.497496000 | 1.287687000  | 0.541365000  |
| 42 | -1.835041000 | -0.377842000 | 0.001378000  |
| 15 | -1.128393000 | -0.468497000 | 2.482354000  |
| 15 | -0.430460000 | -1.414056000 | -1.869546000 |
| 1  | 0.040836000  | -0.061570000 | 0.170299000  |
| 1  | -1.955685000 | -2.272409000 | 0.419821000  |
| 8  | -2.151787000 | -3.407681000 | 0.650397000  |
| 1  | 1.455049000  | -2.962892000 |              |





Electronic Supplementary Information for Dalton Transactions  
This journal is © The Royal Society of Chemistry 2010

|   |              |              |              |   |              |              |              |
|---|--------------|--------------|--------------|---|--------------|--------------|--------------|
| 1 | -3.499277000 | 0.948339000  | -1.606650000 | 1 | 0.759031000  | 3.533197000  | 1.248831000  |
| 1 | -4.450713000 | 1.360760000  | -0.172409000 | 1 | 2.248782000  | 2.585431000  | 1.143720000  |
| 1 | -3.112550000 | 2.397395000  | -0.679073000 | 6 | 0.204083000  | -3.334009000 | -1.746755000 |
| 6 | -3.202660000 | -1.815253000 | -0.605577000 | 1 | 0.897763000  | -4.142452000 | -2.006513000 |
| 1 | -2.723962000 | -2.793601000 | -0.708522000 | 1 | -0.608616000 | -3.749136000 | -1.143580000 |
| 1 | -4.204320000 | -1.984096000 | -0.182283000 | 1 | -0.228553000 | -2.923878000 | -2.664922000 |
| 1 | -3.335064000 | -1.409151000 | -1.613153000 | 6 | 1.916961000  | -2.958215000 | 0.509483000  |
| 6 | -1.425917000 | -2.674915000 | 1.913718000  | 1 | 2.534441000  | -3.755689000 | 0.079224000  |
| 1 | -0.525493000 | -2.780603000 | 2.525675000  | 1 | 2.546687000  | -2.296605000 | 1.111745000  |
| 1 | -2.282544000 | -2.943468000 | 2.549109000  | 1 | 1.174961000  | -3.409578000 | 1.173728000  |
| 1 | -1.379630000 | -3.417801000 | 1.111372000  | 1 | 3.005102000  | -2.619489000 | -2.210244000 |
| 1 | 3.205326000  | -0.997051000 | -1.493401000 | 1 | 2.131072000  | -1.218984000 | -2.888164000 |
| 1 | 1.924766000  | 1.549845000  | -2.863232000 | 1 | 2.299414000  | 0.100326000  | 1.813665000  |
| 6 | -0.256582000 | 3.380353000  | -1.656217000 | 8 | 2.933555000  | 0.089885000  | 2.558003000  |
| 1 | 0.313577000  | 4.287435000  | -1.889382000 | 6 | 4.264093000  | 0.243062000  | 2.029492000  |
| 1 | -0.631223000 | 2.941964000  | -2.586734000 | 1 | 4.944165000  | 0.216938000  | 2.884519000  |
| 1 | -1.117386000 | 3.653890000  | -1.038333000 | 1 | 4.532722000  | -0.573080000 | 1.343975000  |
| 6 | 1.534681000  | 3.178799000  | 0.564860000  | 1 | 4.393613000  | 1.202374000  | 1.509008000  |
| 1 | 2.048765000  | 4.048195000  | 0.137996000  |   |              |              |              |
